# Supplementary material for: Solid-state red-emissive (cyano)vinylene heteroaromatics via Pd-catalysed C–H homocoupling
Source: Royal Society of Chemistry journal article supplement (doi:10.1039/d3ob00560g), 2023-01-01
Supplement: d3ob00560g1.pdf [file d3ob00560g1.pdf]

## Supplementary information

### Solid-state red-emissive (cyano)vinylene heteroaromatics *via* Pd-catalysed C-H homocoupling

*Atul B. Nipate and M. Rajeswara Rao\**

Department of Chemistry, IIT Dharwad, Dharwad-580011, Karnataka, India

#### Table of Contents:

|       |                                                                                               |   |
|-------|-----------------------------------------------------------------------------------------------|---|
| 1.1   | General information.....                                                                      | 3 |
| 1.2   | Experimental Section.....                                                                     | 3 |
| 1.2.1 | General procedure for the Knoevenagel condensation on fluorene using different aldehydes..... | 3 |
| 1.2.2 | Spectral Data of knoevenagel Compounds .....                                                  | 4 |
| 1.2.3 | General Procedure for the synthesis of Benzyl cyanide substituted aldehyde. ....              | 5 |
| 1.2.4 | Spectral Data of knoevenagel Compounds .....                                                  | 6 |
| 1.2.5 | General procedure for homocoupling reaction .....                                             | 6 |
| 1.2.6 | Spectral Data of Homocoupling Compounds .....                                                 | 6 |

#### List of Figures

|                                                                                                                                                                                                                         |    |
|-------------------------------------------------------------------------------------------------------------------------------------------------------------------------------------------------------------------------|----|
| <b>Figure S1:</b> The solution state UV-visible absorption spectra of vinylene- and cyanovinylene-oligothiophenes ( $1 \times 10^{-5} \text{M}$ , $\text{CHCl}_3$ ).....                                                | 8  |
| <b>Figure S2:</b> The solid state UV-visible absorption spectra of vinylene- and cyanovinylene-oligothiophenes .....                                                                                                    | 8  |
| <b>Figure S3:</b> Solution state emission spectra of <b>V1</b> and <b>C1</b> in different solvent.....                                                                                                                  | 9  |
| <b>Figure S4:</b> Aggregation Induced Emission experiment of compound <b>V1</b> .....                                                                                                                                   | 9  |
| <b>Figure S5:</b> Solid state emission spectra of different solvents recrystallized (a) <b>V1</b> and (b) <b>V1-iso</b> .....                                                                                           | 10 |
| <b>Figure S6:</b> a) DFT optimized structures of <b>V1</b> and <b>V1-iso</b> ; b) DFT calculated frontier orbitals and the energy levels of Vinyl Furan ( <b>V4</b> ) and Vinyl Thiophene isomer ( <b>V1-iso</b> )..... | 11 |
| <b>Figure S7:</b> $^1\text{H}$ NMR of Compound <b>1</b> .....                                                                                                                                                           | 14 |
| <b>Figure S8:</b> $^{13}\text{C}$ NMR of Compound <b>1</b> .....                                                                                                                                                        | 15 |
| <b>Figure S9:</b> HRMS of Compound <b>2</b> .....                                                                                                                                                                       | 15 |
| <b>Figure S 10:</b> $^1\text{H}$ NMR of Compound <b>2</b> .....                                                                                                                                                         | 16 |
| <b>Figure S11:</b> $^{13}\text{C}$ NMR of Compound <b>2</b> .....                                                                                                                                                       | 16 |
| <b>Figure S12:</b> $^1\text{H}$ NMR of Compound <b>3</b> .....                                                                                                                                                          | 17 |
| <b>Figure S13:</b> $^{13}\text{C}$ NMR of Compound <b>3</b> .....                                                                                                                                                       | 17 |
| <b>Figure S14:</b> $^1\text{H}$ NMR of Compound <b>4</b> .....                                                                                                                                                          | 18 |
| <b>Figure S15:</b> $^1\text{H}$ NMR of Compound <b>5</b> .....                                                                                                                                                          | 18 |
| <b>Figure S16:</b> $^{13}\text{C}$ NMR of Compound <b>5</b> .....                                                                                                                                                       | 19 |
| <b>Figure S17:</b> $^1\text{H}$ NMR of Compound <b>6</b> .....                                                                                                                                                          | 19 |
| <b>Figure S18:</b> $^1\text{H}$ NMR of Compound <b>7</b> .....                                                                                                                                                          | 20 |
| <b>Figure S19:</b> HRMS of Compound <b>V1</b> .....                                                                                                                                                                     | 20 |
| <b>Figure S20:</b> $^1\text{H}$ NMR of Compound <b>V1</b> .....                                                                                                                                                         | 21 |
| <b>Figure S21:</b> $^{13}\text{C}$ NMR of Compound <b>V1</b> .....                                                                                                                                                      | 21 |
| <b>Figure S22:</b> $^1\text{H}$ NMR of Compound <b>V1-iso</b> .....                                                                                                                                                     | 22 |
| <b>Figure S23:</b> $^{13}\text{C}$ NMR of Compound <b>V1-iso</b> .....                                                                                                                                                  | 22 |
| <b>Figure S24:</b> HRMS of Compound <b>V2</b> .....                                                                                                                                                                     | 23 |
| <b>Figure S25:</b> $^1\text{H}$ NMR of Compound <b>V2</b> .....                                                                                                                                                         | 23 |
| <b>Figure S26:</b> $^{13}\text{C}$ NMR of Compound <b>V2</b> .....                                                                                                                                                      | 24 |
| <b>Figure S27:</b> HRMS of Compound <b>V3</b> .....                                                                                                                                                                     | 25 |
| <b>Figure S28:</b> $^1\text{H}$ NMR of Compound <b>V3</b> .....                                                                                                                                                         | 25 |
| <b>Figure S29:</b> HRMS of Compound <b>V4</b> .....                                                                                                                                                                     | 26 |
| <b>Figure S30:</b> $^1\text{H}$ NMR of Compound <b>V4</b> .....                                                                                                                                                         | 26 |

|                                                                                             |    |
|---------------------------------------------------------------------------------------------|----|
| <b>Figure S31:</b> $^1\text{H}$ NMR of Compound <b>V4</b> .....                             | 27 |
| <b>Figure S32:</b> HRMS of Compound <b>C1</b> .....                                         | 27 |
| <b>Figure S33:</b> $^1\text{H}$ NMR of Compound <b>C1</b> .....                             | 28 |
| <b>Figure S34:</b> HRMS of Compound <b>C2</b> .....                                         | 29 |
| <b>Figure S35:</b> $^1\text{H}$ NMR of Compound <b>C3</b> recorded in $\text{CDCl}_3$ ..... | 30 |
| <b>Figure S36:</b> $^1\text{H}$ NMR of Compound <b>C2</b> recorded in DMSO.....             | 30 |
| <b>Figure S37:</b> HRMS of Compound <b>C3</b> .....                                         | 31 |
| <b>Figure S38:</b> $^1\text{H}$ NMR of Compound <b>C3</b> recorded in $\text{CDCl}_3$ ..... | 32 |
| <b>Figure S39:</b> $^1\text{H}$ NMR of Compound <b>C3</b> recorded in DMSO.....             | 32 |

## List of Tables

|                                                                                      |    |
|--------------------------------------------------------------------------------------|----|
| <b>Table S1:</b> Optimization of reaction condition of thiophene homocoupling* ..... | 11 |
| <b>Table S2:</b> Optimization of Reaction conditions* .....                          | 12 |
| <b>Table S3:</b> The optical and the DFT data of the compounds .....                 | 13 |

## 1.1 General information

Reagents and solvents employed are commercially purchased from sigma, SRL, spectrochem, TCI and used as it is.  $^1\text{H}$  and  $^{13}\text{C}$  (Nuclear magnetic resonance) solution state NMR studies are performed in Jeol:400 MHz NMR spectrometer. Agilent Cary 5000 UV-Vis-NIR spectrophotometer with diffuse reflectance and solution state accessory is employed to study the optical properties of the organic compounds synthesized. Perkin Elmer FL 6500 used to study the fluorescence properties. DFT calculations of the molecular structures (in the gas phase) and the molecular orbital energies were carried out at the B3LYP/6-31G(d) level as implemented in Gaussian 16. The figures were generated with GaussView 6.0.

## 1.2 Experimental Section

### 1.2.1 General procedure for the Knoevenagel condensation on fluorene using different aldehydes<sup>1</sup>

The procedure for the synthesis of these compounds have been modified compared to the literature. A mixture of fluorene (500 mg, 3 mmol, 1eq) and NaOH (265 mg, 6.6 mmol, 2.2 eq) were dissolved in 5 ml ethanol and introduced aldehyde (3 mmol, 1eq) and heated to reflux for 12 hrs. The reaction mixture was then cooled to room temperature and the brownish yellow solid was collected and purified using silica gel column chromatography (petroleum ether) to isolate the pure product. Schematic of the reaction is represented as scheme 1.

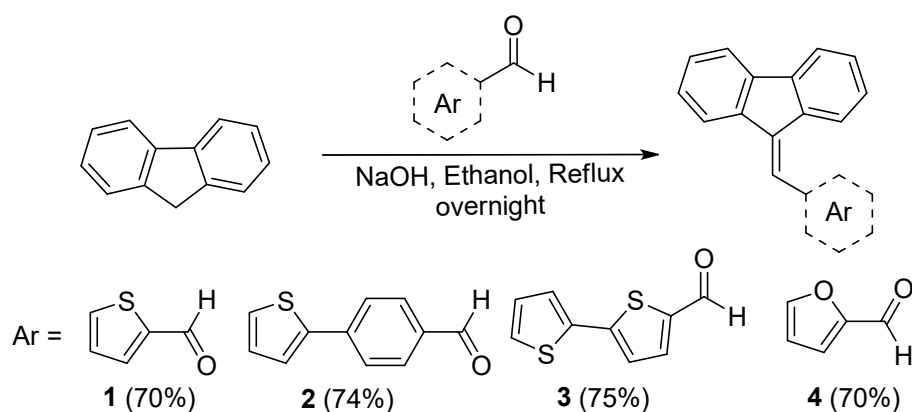

**Scheme 1:** Synthesis route for the synthesis of Knoevenagel condensation products of fluorenes with various aldehydes

### 1.2.2 Spectral Data of Knoevenagel Compounds

**Compound 1** yield 70%, Yellow solid, <sup>1</sup>H NMR (400 MHz, CDCl<sub>3</sub>) δ 8.13-8.11 (d, *J* = 7.8 Hz, 1H), 7.76-7.70 (m, 3H), 7.62 (s, 1H), 7.48- 7.44 (m, 2H), 7.39 – 7.30 (m, 3H), 7.23 – 7.13 (m, 2H); <sup>13</sup>C NMR (101 MHz CDCl<sub>3</sub>) δ 141.41, 139.70, 139.27, 139.11, 136.67, 136.33,

129.51, 128.94, 128.43, 127.78, 127.54, 127.18, 127.03, 124.56, 120.37, 119.97, 119.80, 77.57, 77.25, 76.93.

**Compound 2** yield 74%, Yellow solid, **HRMS**:  $m/z$  calcd for  $C_{24}H_{16}SH$  ( $[M+1]$ ): 337.1051; found  $m/z$ : 337.1054;  **$^1H$  NMR (400 MHz,  $CDCl_3$ )**  $\delta$  7.80-7.79 (d,  $J = 7.4$  Hz 1H), 7.74 – 7.79 (m, 4H), 7.67 (s, 1H), 7.64-7.62 (d,  $J = 8.1$  Hz 2H), 7.42-7.31 (m, 5H), 7.14-7.07 (m 2H);  **$^{13}C$  NMR (101 MHz,  $CDCl_3$ )**  $\delta$  144.04, 141.39, 139.59, 139.23, 136.64, 136.54, 136.02, 130.12, 128.71, 128.31, 127.10, 126.83, 125.90, 125.26, 124.53, 123.49, 120.35, 80, 119.87, 119.70, 77.44, 77.12, 76.80.

**Compound 3** yield 75%, Yellow solid,  **$^1H$  NMR (400 MHz,  $CDCl_3$ )**  $\delta$  8.31- 8.29 (d,  $J = 7.8$  Hz 1H), 7.75-7.70 (m, 3H), 7.56 (s, 1H), 7.38 – 7.27 (m 6H), 7.22-7.21 (d,  $J = 3.7$  Hz), 7.07-7.05 (dd,  $J = 5.1, 3.7$  Hz);  **$^{13}C$  NMR (101 MHz,  $CDCl_3$ )**  $\delta$  141.33, 139.73, 139.53, 138.93, 138.11, 137.11, 136.14, 130.94, 128.85, 128.31, 128.12, 127.10, 127.01, 125.09, 124.55, 124.25, 120.23, 119.95, 119.74, 118.75, 77.43, 77.11, 76.80

**Compound 4** yield 70% Brown solid,  **$^1H$  NMR (400 MHz,  $CDCl_3$ )**  $\delta$  8.76 (d,  $J = 7.4$  Hz, 1H), 7.75 - 7.69 (m, 4H), 7.41 – 7.25 (m, 5H), 6.77 – 6.76 (m, 1H), 6.59 (dd,  $J = 3.4, 1.8$  Hz, 1H).

### 1.2.3 General Procedure for the synthesis of Benzyl cyanide substituted aldehyde.

A mixture of aryl acetonitrile (500mg 4.27 mmol) and NaOH (376 mg 9.40 mmol) were dissolved in 5 ml ethanol and introduced aldehyde (4.27 mmol) and stirred at room temperature for 12 hrs. The yellow solid thus formed was collected and purified using silica gel column chromatography [ $CH_2Cl_2$  (5%): petroleum ether (95%)] to isolate the pure product. Schematic of the reaction is represented as scheme 2.

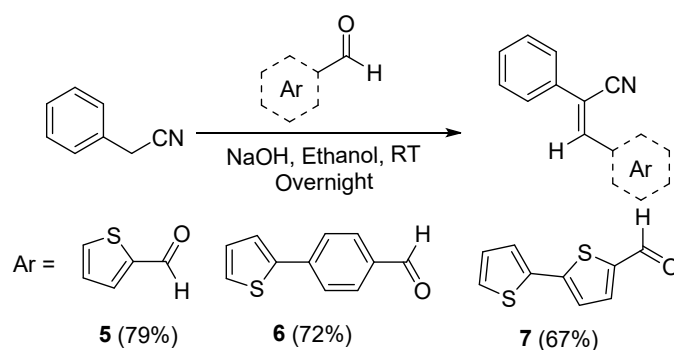

**Scheme 2:** Synthesis route for the synthesis of Knoevenagel condensation products of aryl acetonitriles with various aldehydes

### 1.2.4 Spectral Data of Knoevenagel Compounds

**Compound 5** yield 79 % light yellow solid,  $^1\text{H NMR}$  (400 MHz,  $\text{CDCl}_3$ ):  $\delta$  7.67 – 7.63 (m, 4H), 7.56 – 7.54 (m, 1H), 7.45 – 7.42 (m, 2H), 7.15 (dd,  $J = 5.1, 3.9$  Hz, 1H).  $^{13}\text{C NMR}$  (101 MHz,  $\text{CDCl}_3$ )  $\delta$  138.03, 134.34, 133.94, 132.65, 130.18, 129.21, 129.08, 127.97, 125.77, 118.30, 77.55, 77.23, 76.92.

**Compound 6** yield 72% Yellow solid,  $^1\text{H NMR}$  (400 MHz,  $\text{CDCl}_3$ ):  $\delta$  7.91 (d,  $J = 8.3$  Hz, 2H), 7.71 – 7.67 (m, 4H), 7.51 (s, 1H), 7.46 – 7.39 (m, 4H), 7.35 (dd,  $J = 5.1, 1.1$  Hz, 1H), 7.34 (dd,  $J = 5.1, 3.6$  Hz).

**Compound 7** yield 67% Brown solid,  $^1\text{H NMR}$  (400 MHz,  $\text{CDCl}_3$ ):  $\delta$  7.64 – 7.62 (m, 2H), 7.59 (d, 1H), 7.50 – 7.49 (m, 1H), 7.44 – 7.41 (m, 2H), 7.37 – 7.29 (m, 3H), 7.19 (d,  $J = 3.9$  Hz, 1H), 7.05 (dd,  $J = 5.1, 3.6$  Hz, 1H).

### 1.2.5 General procedure for homocoupling reaction

A mixture of fluorene /aryl acetonitrile substituted thiophene (1.92 mmol),  $\text{Pd}(\text{OAc})_2$  (5mol %) KOAc (9.6 mmol, 5 eq.), pivalic Acid (0.29 mmol, 0.15eq) and DMAc (3 ml) were added to a pressure tube and purged with nitrogen gas. After the purging the mixture was heated at  $140^\circ\text{C}$  for 36 hrs. The reaction mixture was brought to room temperature and extracted with

ethyl acetate and concentrated in vacuum. The crude mixture was then subjected to silica gel column chromatography using petroleum ether and CH<sub>2</sub>Cl<sub>2</sub> to isolate the pure product.

### 1.2.6 Spectral Data of Homocoupled Compounds

**V1:** yield 76% Red solid, **HRMS:** m/z calcd for C<sub>36</sub>H<sub>22</sub>S<sub>2</sub> ([M<sup>+</sup>]): 518.1163; found m/z: 518.1165; **<sup>1</sup>H NMR (400 MHz, CDCl<sub>3</sub>)** δ 8.32 (d, *J* = 7.8 Hz, 2H), 7.76 – 7.71 (m, 6H), 7.57 (s, 2H), 7.43 – 7.23 (m, 12H). **<sup>13</sup>C NMR (101 MHz, CDCl<sub>3</sub>)** δ 141.41, 139.71, 139.03, 138.99, 138.84, 136.50, 136.11, 131.11, 128.94, 128.41, 127.13, 127.03, 124.62, 124.57, 120.26, 119.97, 119.75, 118.75, 77.39, 77.07, 76.76.

**V1-iso:** yield 7% Red solid, **<sup>1</sup>H NMR (400 MHz, CDCl<sub>3</sub>)** δ 8.39 (m, 2H), 7.77 – 7.68 (m, 6H), 7.59 (s 1H), 7.54 (s, 1H), 7.42 – 7.25 (m, 10H), 7.17 – 7.11 (m, 2H); **<sup>13</sup>C NMR (101 MHz, CDCl<sub>3</sub>)** δ 146.72, 141.26, 139.84, 138.87, 138.08, 136.22, 135.70, 131.26, 131.24, 131.15, 129.81, 128.80, 128.72, 128.27, 128.18, 128.04, 127.08, 127.05, 126.98, 126.96, 125.90, 125.81, 125.78, 124.56, 123.68, 123.17, 120.23, 120.18, 119.92, 119.89, 119.70, 119.27, 119.11, 77.42, 77.10, 76.78.

**V2:** yield 71% yellow solid, **HRMS:** m/z calcd for C<sub>48</sub>H<sub>30</sub>S<sub>2</sub> ([M<sup>+</sup>]): 670.1789; found m/z: 670.1724; **<sup>1</sup>H NMR (400 MHz, CDCl<sub>3</sub>)** δ 7.80 (d, *J* = 8.0 Hz, 2H), 7.73 – 7.63 (m, 18H), 7.40-7.30 (m, 8H), 7.12 (t, *J* = 7.5 Hz, 2H). **<sup>1</sup>H NMR (400 MHz, DMSO-*d*<sub>6</sub>)** δ 7.92 (d, *J* = 7.5 Hz, 2H), 7.83 – 7.77 (m, 10H), 7.65 (m, 6H), 7.55 (d, *J* = 3.8 Hz 2H), 7.39 – 7.31 (m, 8H), 7.12 (t, *J* = 7.5 Hz 2H). **<sup>13</sup>C NMR (101 MHz, CDCl<sub>3</sub>)** δ 141.42, 139.55, 139.24, 136.71, 136.49, 130.23, 129.87, 128.78, 128.38, 127.13, 126.83, 126.39, 125.68, 124.51, 123.81, 120.37, 119.89, 119.89, 77.42, 77.10, 76.78

**V3:** yield 71 % Red solid, **HRMS:** m/z calcd for C<sub>44</sub>H<sub>26</sub>S<sub>4</sub> ([M<sup>+</sup>+H]): 683.0990; found m/z: 683.0999; **<sup>1</sup>H NMR (400 MHz, CDCl<sub>3</sub>)** δ 8.31 (d, *J* = 7.8 Hz, 2H), 7.75-7.70 (m, 6.19H), 7.55 (s, 2H), 7.40 – 7.31 (m, 11.23H), 7.22 (d, *J* = 3.8 Hz, 2H), 7.18 (d, *J* = 3.8 Hz, 2H), 7.14

(d,  $J = 3.8$  Hz, 2H);  $^{13}\text{C}$  NMR (101 MHz,  $\text{CDCl}_3$ )  $\delta$  141.37, 139.97, 139.71, 138.95, 138.47, 136.07, 131.10, 128.88, 128.33, 127.03, 124.54, 120.23, 119.93, 119.72, 118.53, 77.39, 77.08, 76.76

**V4:** yield 65 % Red solid, **HRMS:**  $m/z$  calcd for  $\text{C}_{36}\text{H}_{22}\text{O}_2$  ( $[\text{M}^+]$ ): 486.1620; found  $m/z$ : 486.1624;  $^1\text{H}$  NMR (400 MHz,  $\text{CDCl}_3$ )  $\delta$  8.75 (d,  $J = 7.8$  Hz, 2H), 7.72-7.67 (m, 8H), 7.46 - 7.23 (m, 8H), 7.0 (d,  $J = 4$  Hz, 2H), 6.8 (d,  $J = 3.6$  Hz, 2H).  $^1\text{H}$  NMR (400 MHz,  $\text{DMSO-d}_6$ )  $\delta$  8.69 (d,  $J = 7.8$  Hz, 2H), 7.98 - 7.93 (m, 2H), 7.92 - 7.83 (m, 4H), 7.69 (s, 2H), 7.38 - 7.31 (m, 6H), 7.25 (m, 6H),  $^{13}\text{C}$  NMR data was not obtained due to the poor solubility of the compound.

**C1:** yield 78% Red solid, **HRMS:**  $m/z$  calcd for  $\text{C}_{26}\text{H}_{16}\text{N}_2\text{S}_2\text{H}$  ( $[\text{M}+\text{H}]$ ): 421.0828; found  $m/z$ : 421.0830;  $^1\text{H}$  NMR (400 MHz,  $\text{DMSO-d}_6$ )  $\delta$  8.27 (s, 2H), 7.72-7.70 (m, 6H), 7.62 (m, 2H), 7.47 (m, 4H), 7.41 (m, 2H);  $^{13}\text{C}$  NMR data was not obtained due to the poor solubility of the compound.

**C2:** yield 69% yellow solid, **HRMS:**  $m/z$  calcd for  $\text{C}_{38}\text{H}_{24}\text{N}_2\text{S}_2\text{H}$  ( $[\text{M}+\text{H}]$ ): 573.1454; found  $m/z$ : 573.1459;  $^1\text{H}$  NMR (400 MHz,  $\text{CDCl}_3$ )  $\delta$  7.89-7.85 (m, 4H), 7.7-7.6 (m, 8H), 7.48-7.28 (m, 12H).  $^1\text{H}$  NMR (400 MHz,  $\text{DMSO-d}_6$ )  $\delta$  7.92 (m, 6H), 7.8-7.7 (m, 6H), 7.48 (m, 12H)  $^{13}\text{C}$  NMR (101 MHz,  $\text{CDCl}_3$ )  $\delta$  141.30, 135.26, 134.53, 130.61, 130.10, 130.23, 129.19, 126.06, 125.41, 125.13, 124.58, 118.18, 111.29, 77.40, 77.09, 76.77.

**C3:** yield 66% Red solid, **HRMS:**  $m/z$  calcd for  $\text{C}_{34}\text{H}_{20}\text{N}_2\text{S}_4$  ( $[\text{M}^+]$ ): 584.0509; found  $m/z$ : 584.0518;  $^1\text{H}$  NMR (400 MHz,  $\text{CDCl}_3$ )  $\delta$  7.6 (m, 9H), 7.4 (m, 9H) 7.1 (m, 2H).  $^1\text{H}$  NMR (400 MHz,  $\text{DMSO-d}_6$ ) 8.2 (s, 2H), 7.72 (m, 7.37H), 7.5-7.4 (m, 7.49H), 7.4 (m, 4.14H);  $^{13}\text{C}$  NMR data was not obtained due to the poor solubility of the compound.



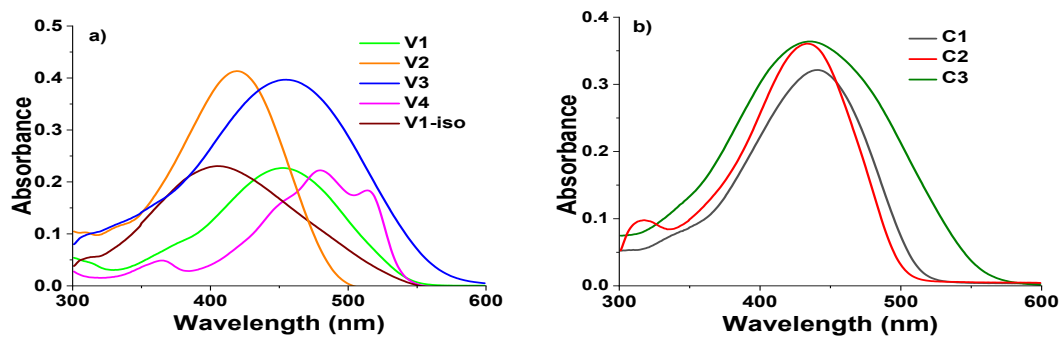

**Figure S1:** The solution state UV-visible absorption spectra of vinylene- and cyanovinylene-oligothiophenes ( $1 \times 10^{-5} \text{M}$ ,  $\text{CHCl}_3$ ).

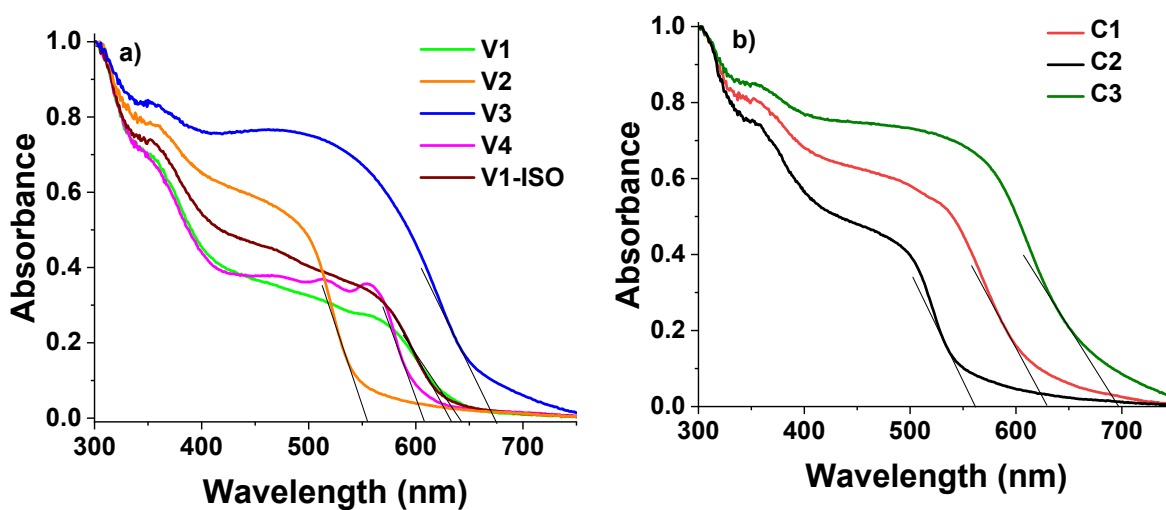

**Figure S2:** The solid state UV-visible absorption spectra of vinylene- and cyanovinylene-oligothiophenes

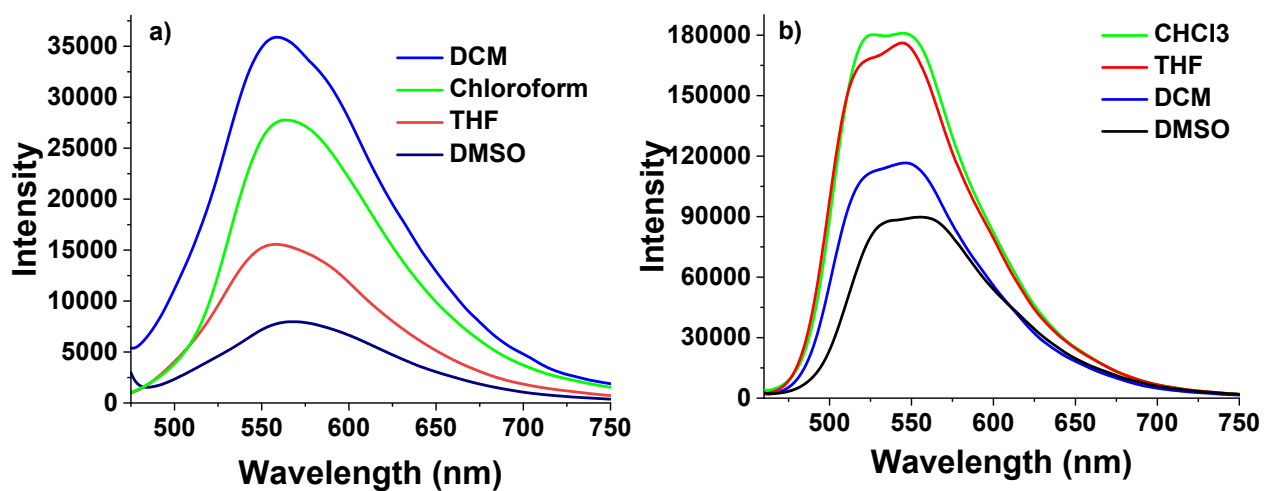

Figure S3: Solution state emission spectra of V1 and C1 in different solvent.

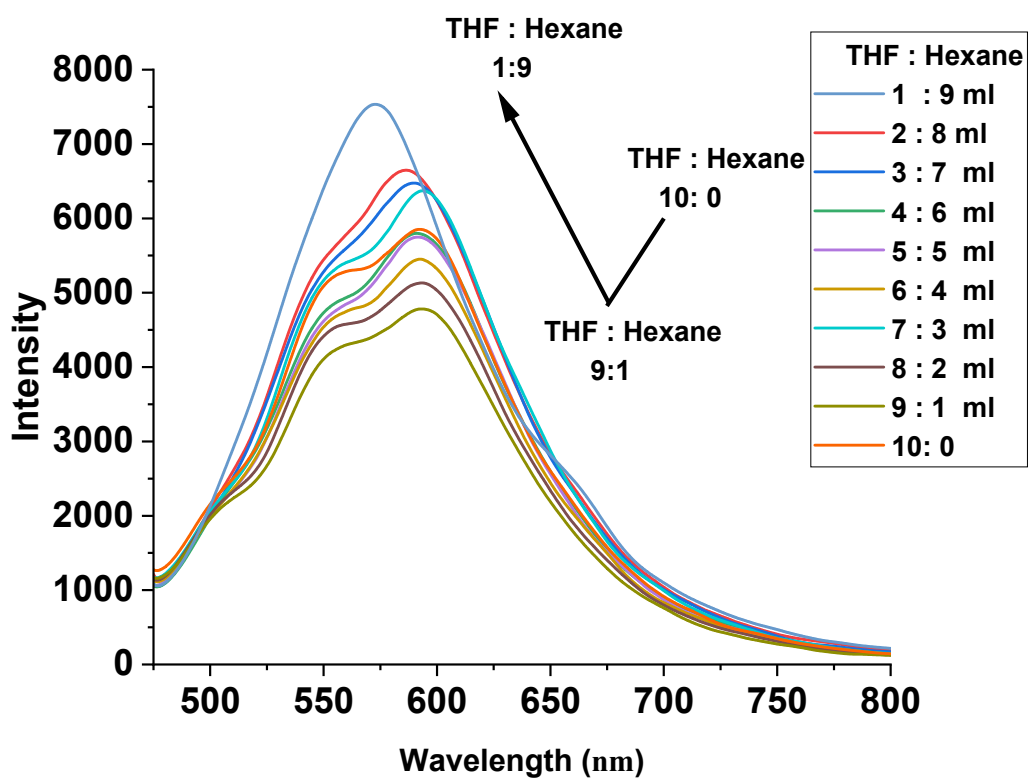

Figure S4: Aggregation Induced Emission experiment of compound V1

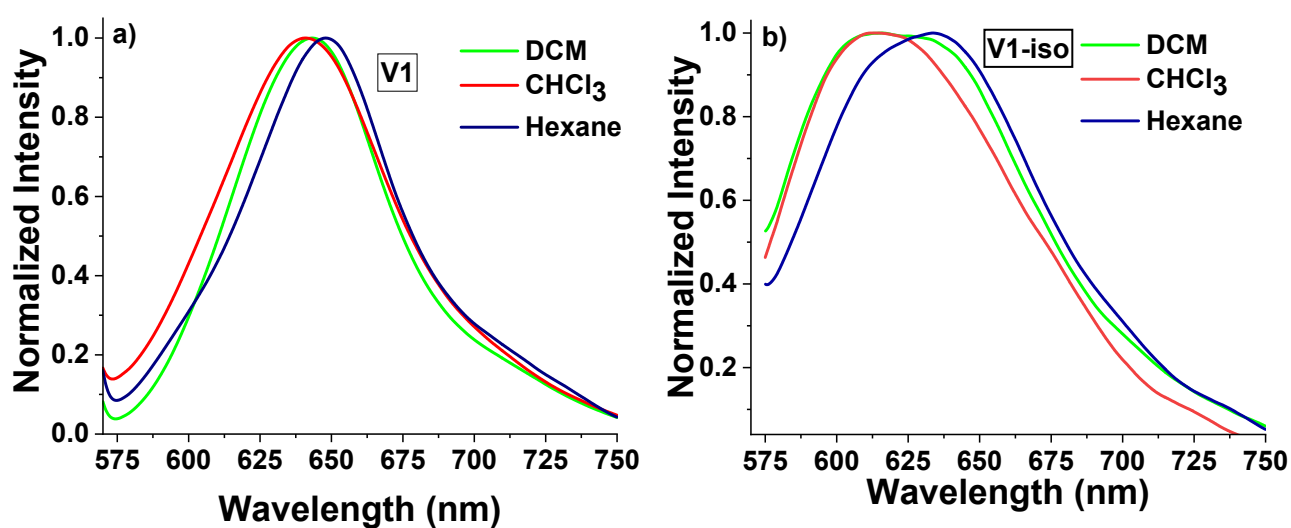

**Figure S5:** Solid state emission spectra of different solvents recrystallized (a) V1 and (b) V1-iso

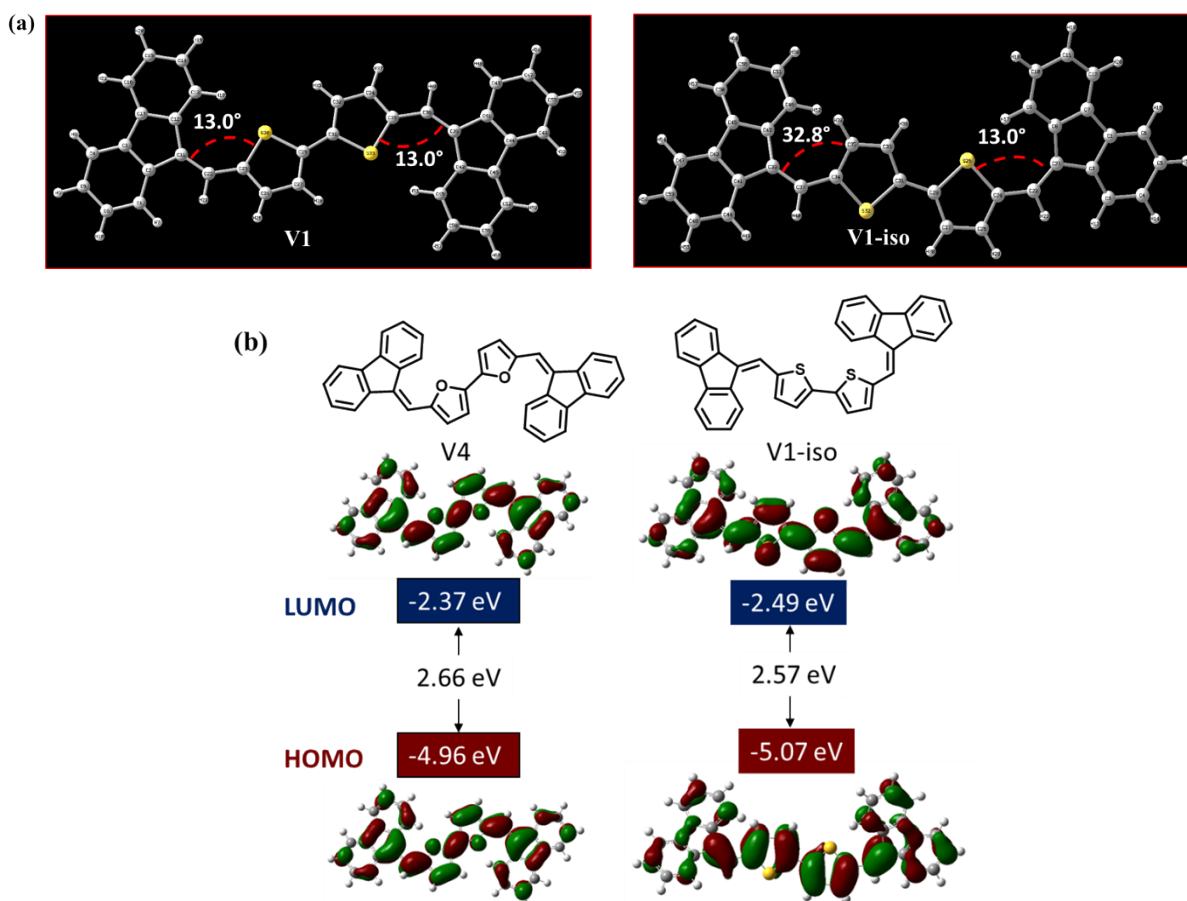

**Figure S6:** a) DFT optimized structures of V1 and V1-iso; b) DFT calculated frontier orbitals and the energy levels of Vinyl Furan (V4) and Vinyl Thiophene isomer (V1-iso)

**Table S1: Optimization of reaction condition of thiophene homocoupling\***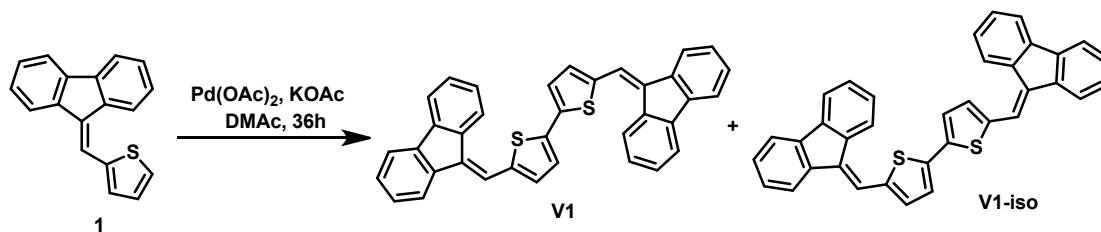

| Entry | Catalyst                  | Ligand         | Acid         | Base | Additive | Solvent | Yields    |               | Temp. |
|-------|---------------------------|----------------|--------------|------|----------|---------|-----------|---------------|-------|
|       |                           |                |              |      |          |         | <b>V1</b> | <b>V1-iso</b> |       |
| 1     | $\text{Pd}(\text{OAc})_2$ | $\text{PPh}_3$ | Pivalic Acid | KOAc | -        | DMAc    | 12%       | NP            | 120°C |
| 2     | $\text{Pd}(\text{OAc})_2$ | -              | -            | KOAc | -        | DMAc    | 40%       | NP            | 120°C |
| 3     | $\text{Pd}(\text{OAc})_2$ | -              | -            | -    | AgOAc    | DMAc    | 30%       | 10%           | 120°C |
| 4     | $\text{Pd}(\text{OAc})_2$ | -              | Pivalic acid | KOAc | -        | DMAc    | 65%       | traces        | 120°C |
| 5     | $\text{Pd}(\text{OAc})_2$ | -              | TFA          | KOAc | -        | DMAc    | 5%        | NP            | 140°C |
| 6     | $\text{Pd}(\text{OAc})_2$ | -              | Pivalic acid | KOAc | -        | DMAc    | 76%       | 7%            | 140°C |
| 7     | $\text{Pd}(\text{OAc})_2$ | -              | Pivalic Acid | KOAc | -        | DMF     | 20%       | NP            | 140°C |

\*Reaction conditions: substrate (1.92 mmol, 1eq), catalyst (5 mol%), ligand (0.38 mmol, 0.2eq), Acid (0.29 mmol, 0.15eq), Base (9.6 mmol, 5eq), Additive (3.84 mmol, 2eq) and DMAc-3ml.

**Table S2:** Optimization of Reaction conditions\*

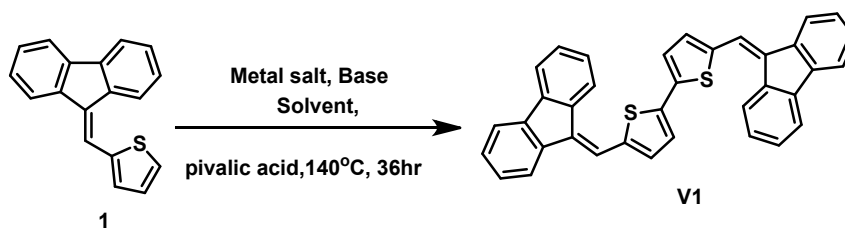

| Entry | Catalyst                                           | Base                            | solvent | Yields |
|-------|----------------------------------------------------|---------------------------------|---------|--------|
| 1     | Pd(OAc) <sub>2</sub>                               | KOAc                            | HFIP    | 5%     |
| 2     | PdCl <sub>2</sub> (PPh <sub>3</sub> ) <sub>2</sub> | KOAc                            | DMAc    | 5%     |
| 3     | PdCl <sub>2</sub>                                  | KOAc                            | DMAc    | 67%    |
| 4     | Pd <sub>2</sub> (dba) <sub>3</sub>                 | KOAc                            | DMAc    | 10%    |
| 5     | Pd(OAc) <sub>2</sub>                               | Na <sub>2</sub> CO <sub>3</sub> | DMAc    | 69%    |
| 6     | Pd(OAc) <sub>2</sub>                               | K <sub>2</sub> CO <sub>3</sub>  | DMAc    | 70%    |
| 7     | Ni(dppf)Cl <sub>2</sub>                            | KOAc                            | DMAc    | ~5%    |
| 8     | Ni(ncy <sub>3</sub> )Cl <sub>2</sub>               | KOAc                            | DMAc    | ~5%    |
| 9     | Pd(OAc) <sub>2</sub>                               | KOAc                            | Toluene | ~5%    |
| 10    | Pd(OAc) <sub>2</sub>                               | KOAc                            | dioxane | ~4%    |
| 11    | Pd(OAc) <sub>2</sub>                               | KOAc                            | DMSO    | 52%    |

\*Reactions conditions: substrate (1.92 mmol, 1eq), catalyst (5 mol%), Base (9.6 mmol, 5eq), Additive and Solvent-3ml.

**Table S3:** The optical and the DFT data of the compounds

| comp       | Abs                                                                                   |          | Emission                                        |       | QY (Ø)   |       | DFT   |       | Calculated Band Gap |
|------------|---------------------------------------------------------------------------------------|----------|-------------------------------------------------|-------|----------|-------|-------|-------|---------------------|
|            | Solution*<br>[Extinction coefficient ( $10^7$ ),<br>$\epsilon_0$ ( $M^{-1}cm^{-1}$ )] | Solid    | Solution<br>CHCl <sub>3</sub><br>( $10^{-5}M$ ) | Solid | Solution | Solid | HOMO  | LUMO  |                     |
| V1         | 453 (4.5)                                                                             | 557      | 559                                             | 643   | 0.3%     | 10%   | -5.05 | -2.56 | 2.49                |
| V1-<br>ISo | 407 (4.1)                                                                             | 560      | 577                                             | 650   | 0.8%     | 9%    | -2.49 | -5.08 | 2.57                |
| V2         | 419 (4.2)                                                                             | 485      | 522                                             | 566   | 70%      | ~1%   | -5.09 | -2.21 | 2.87                |
| V3         | 455 (4.6)                                                                             | 533      | 602                                             | 655   | 2%       | 4%    | -4.91 | -2.56 | 2.34                |
| V4         | 482 (4.8), 515 (5.1)                                                                  | 515, 554 | 540,568                                         | 620   | 3%       | 6%    | -4.97 | -2.39 | 2.58                |
| C1         | 440 (4.4)                                                                             | 531      | 544                                             | 625   | 2%       | ~1%   | -5.39 | -2.82 | 2.56                |
| C2         | 433 (4.3)                                                                             | 488      | 513                                             | 596   | 5%       | ~1%   | -5.26 | -2.63 | 2.62                |
| C3         | 436 (4.4)                                                                             | 558      | 577                                             | 647   | 4%       | ~1%   | -5.11 | -2.76 | 2.35                |

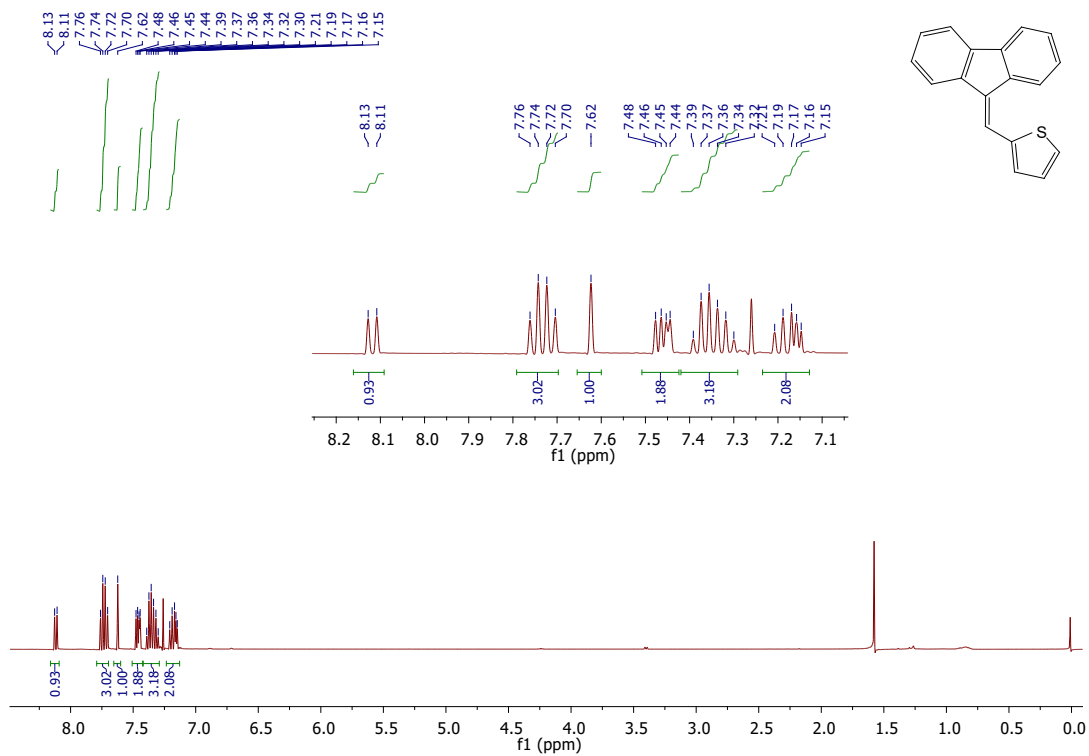

Figure S7: <sup>1</sup>H NMR of Compound 1

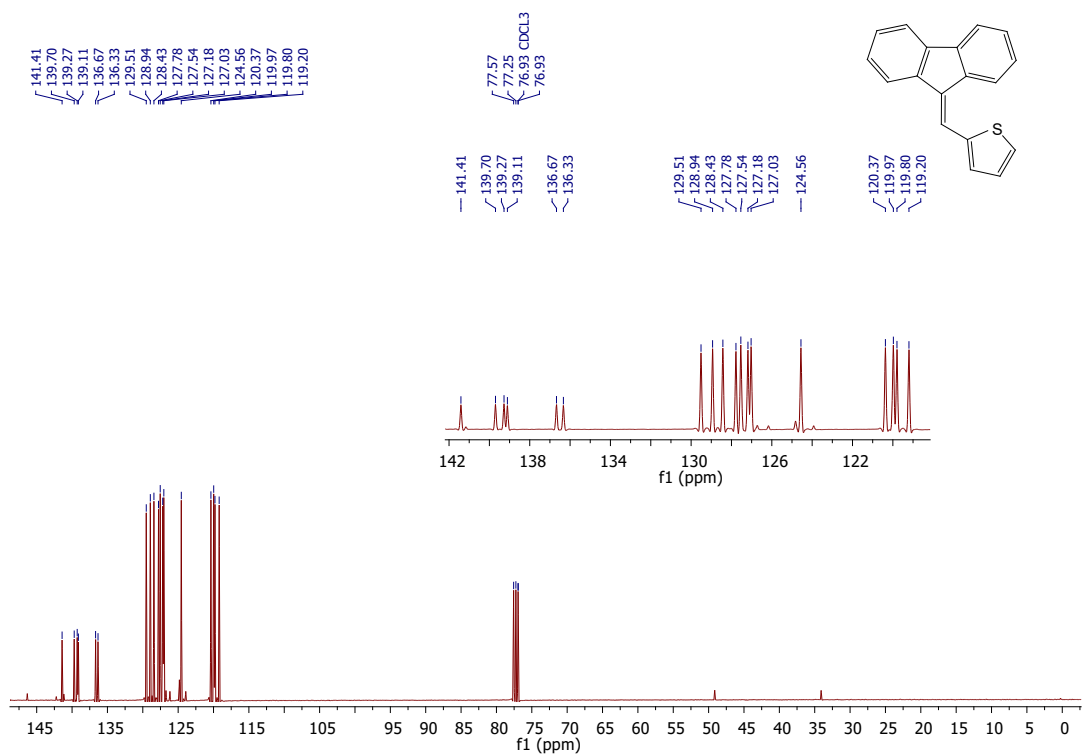

Figure S8: <sup>13</sup>C NMR of Compound 1

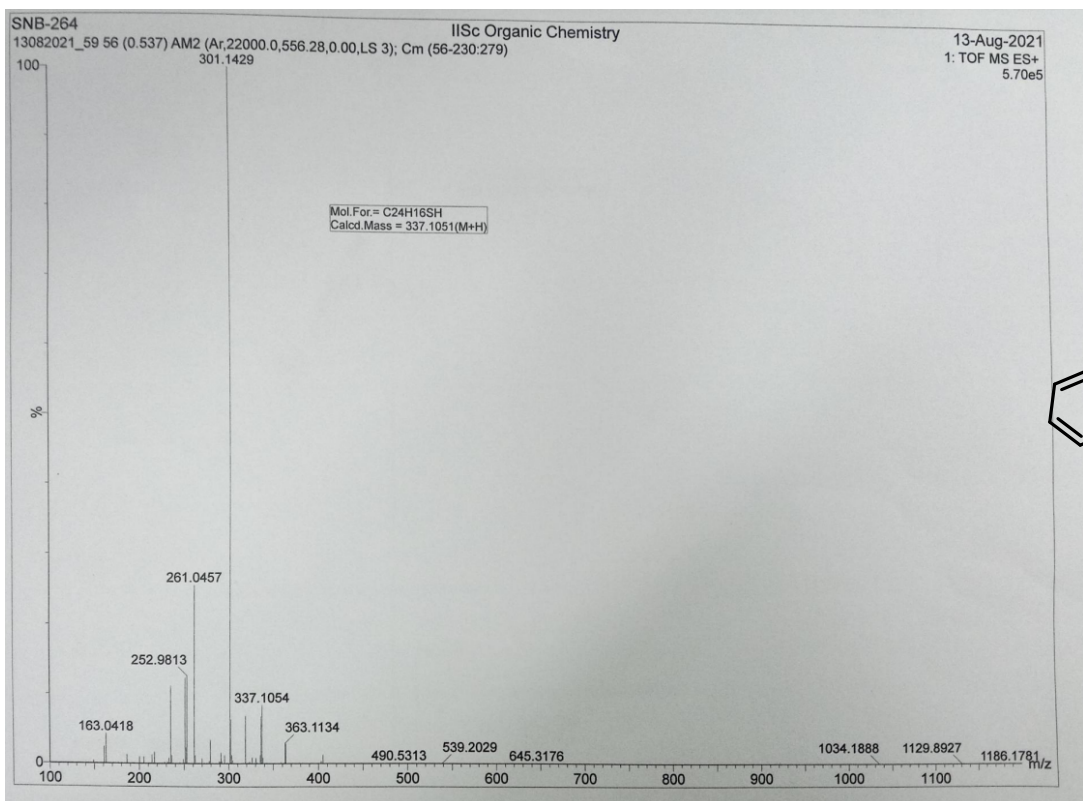

**Figure S9:** HRMS of Compound 2



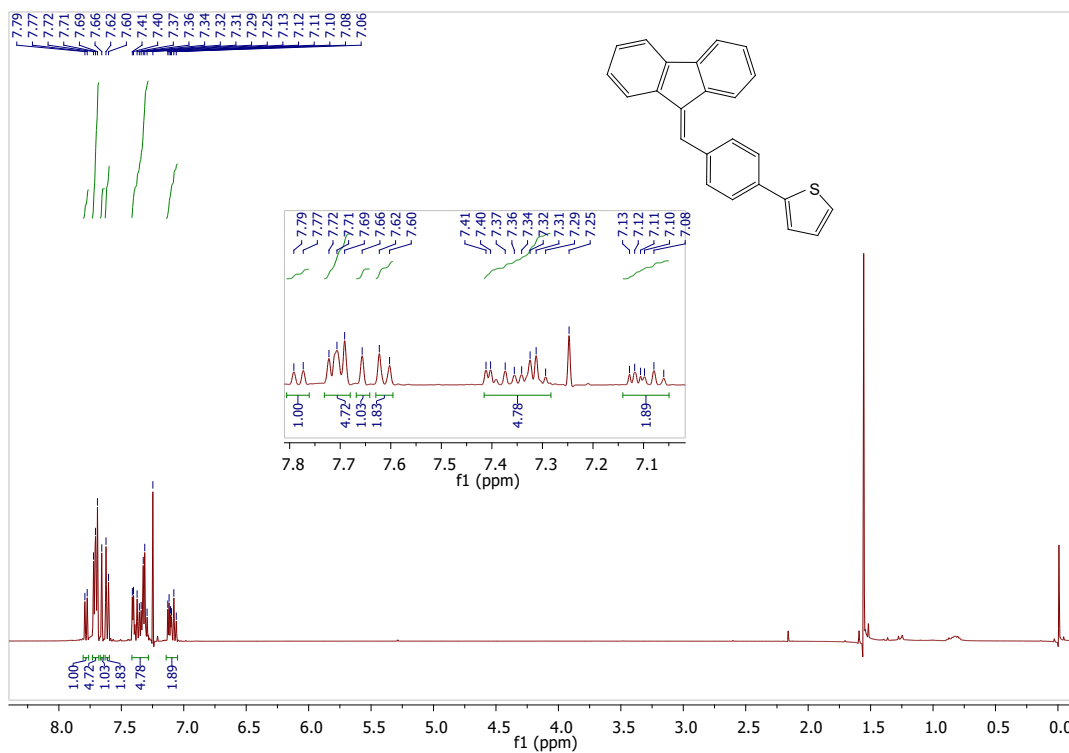

**Figure S10:  $^1\text{H}$  NMR of Compound 2**

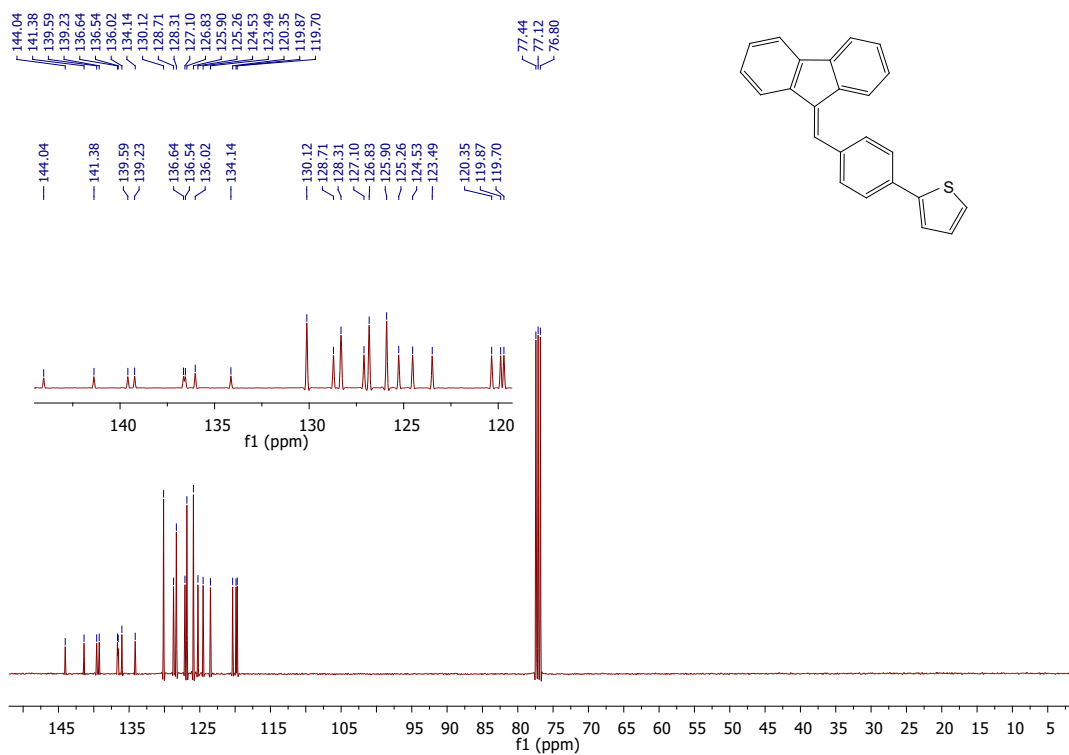

**Figure S11:  $^{13}\text{C}$  NMR of Compound 2**

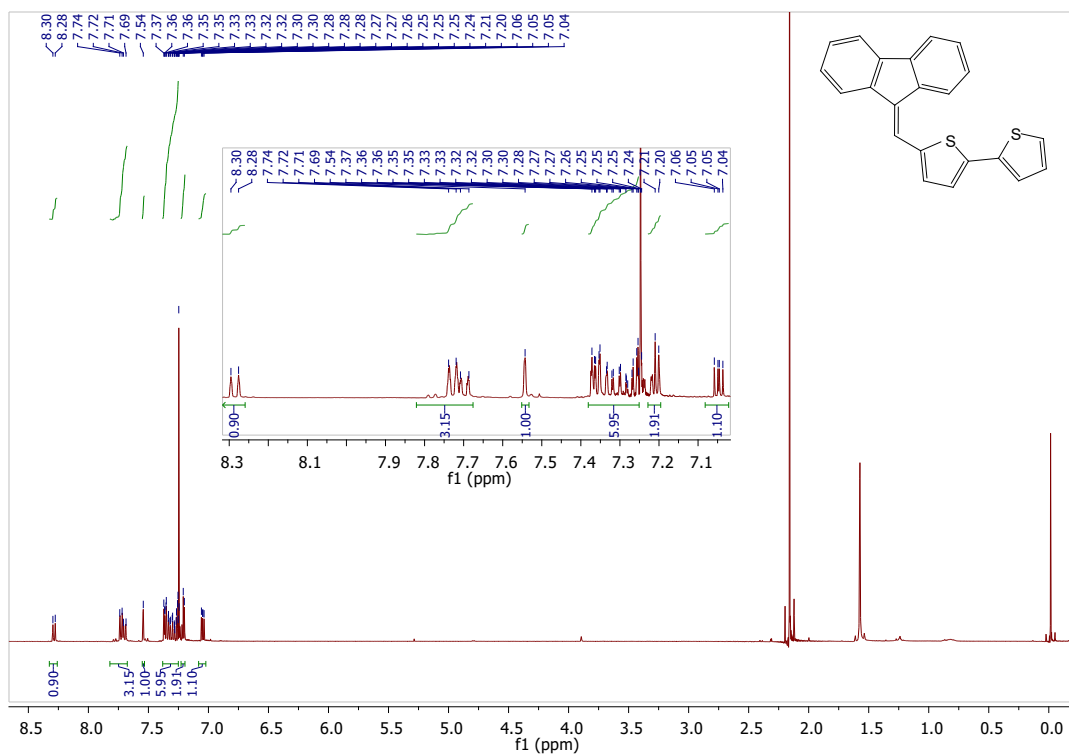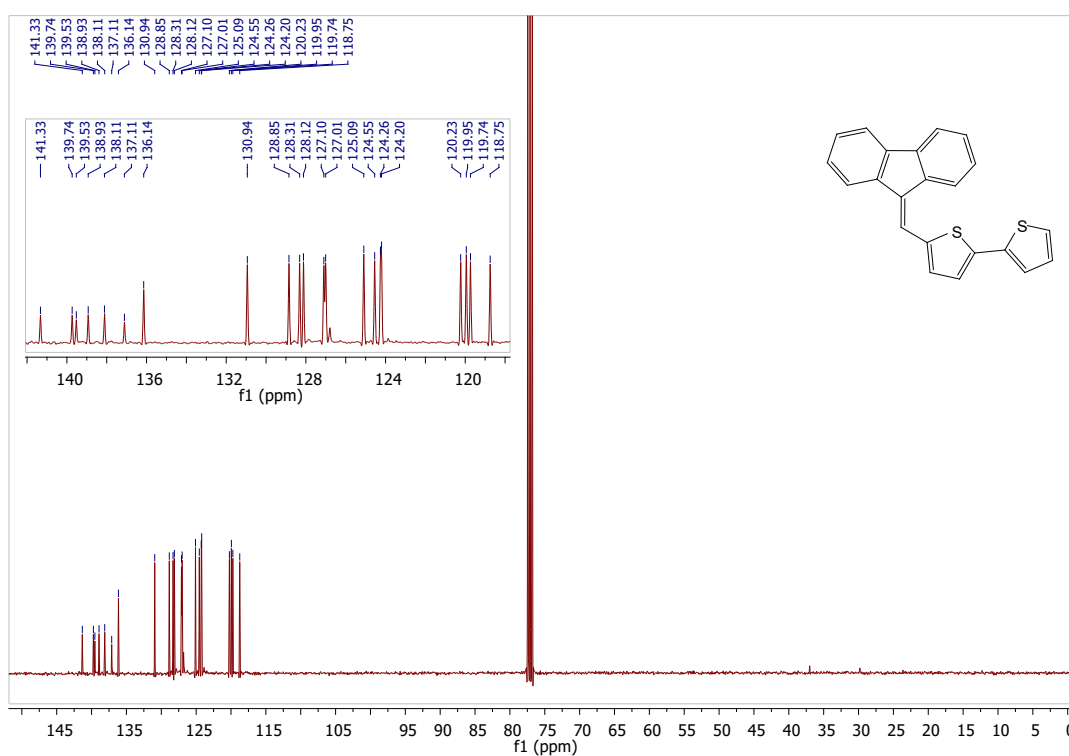

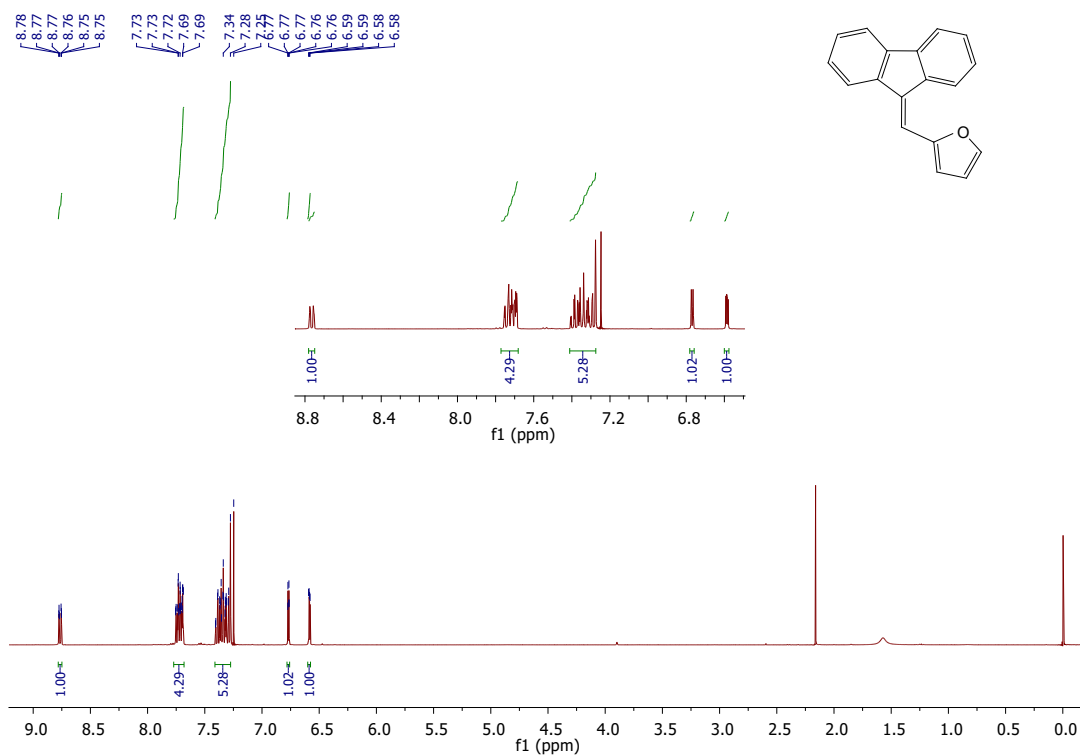

Figure S14:  $^1\text{H}$  NMR of Compound 4

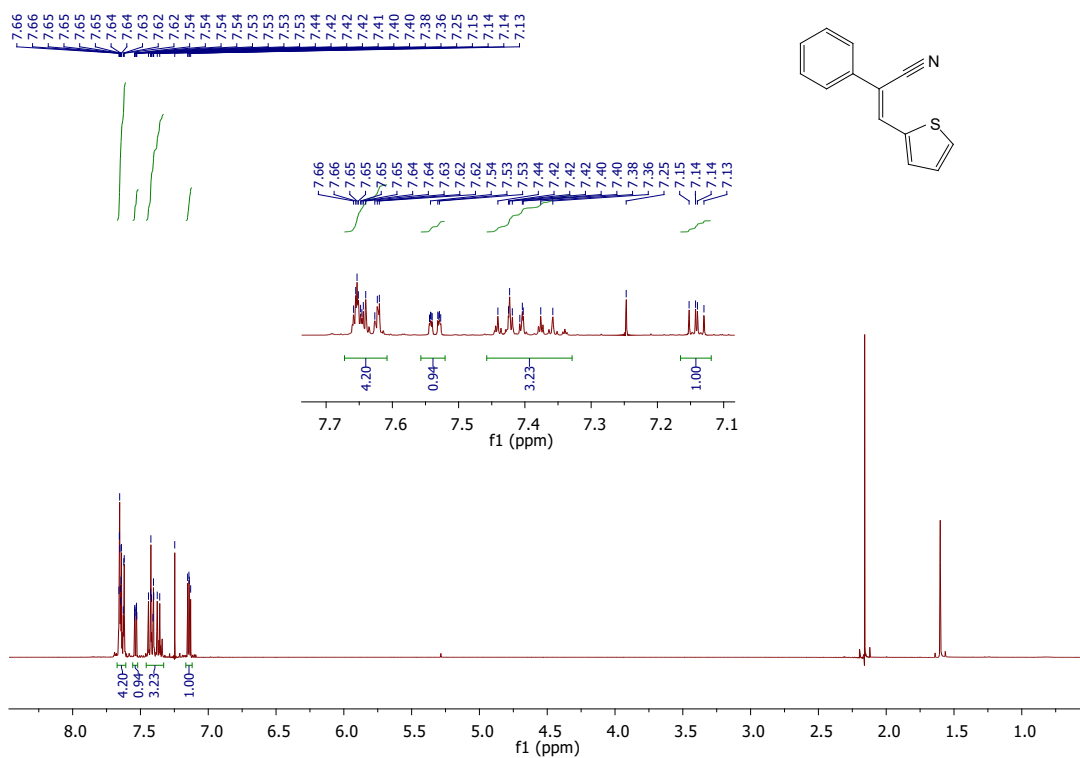

Figure S15:  $^1\text{H}$  NMR of Compound 5

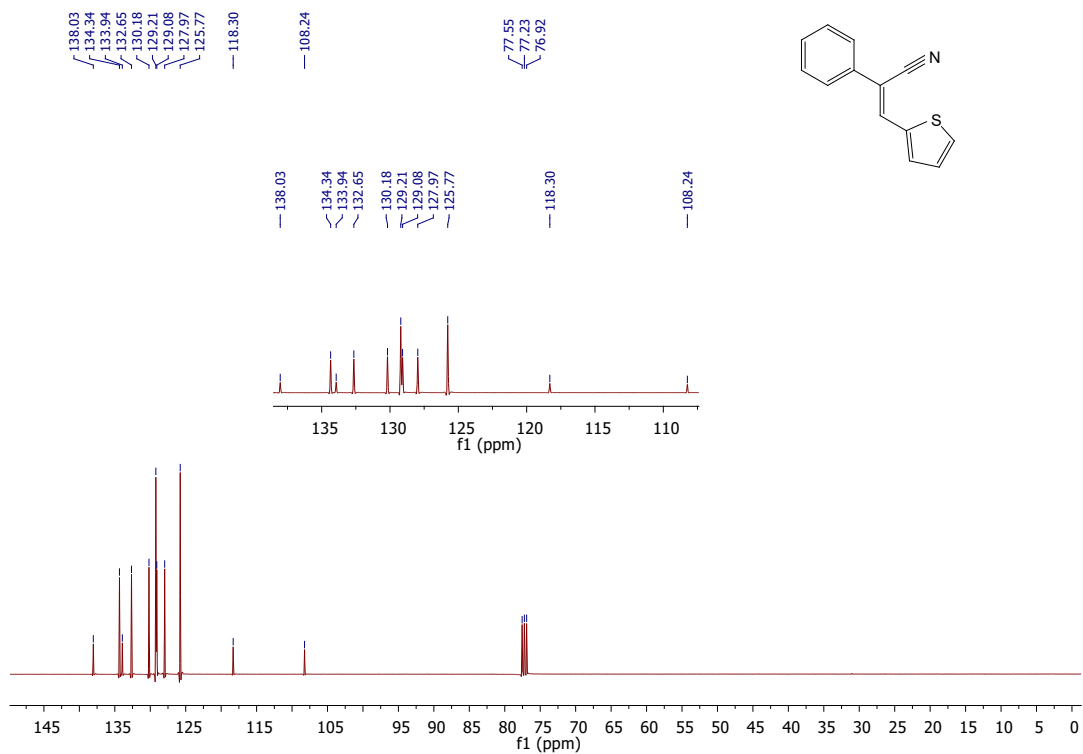

**Figure S16:**  $^{13}\text{C}$  NMR of Compound 5

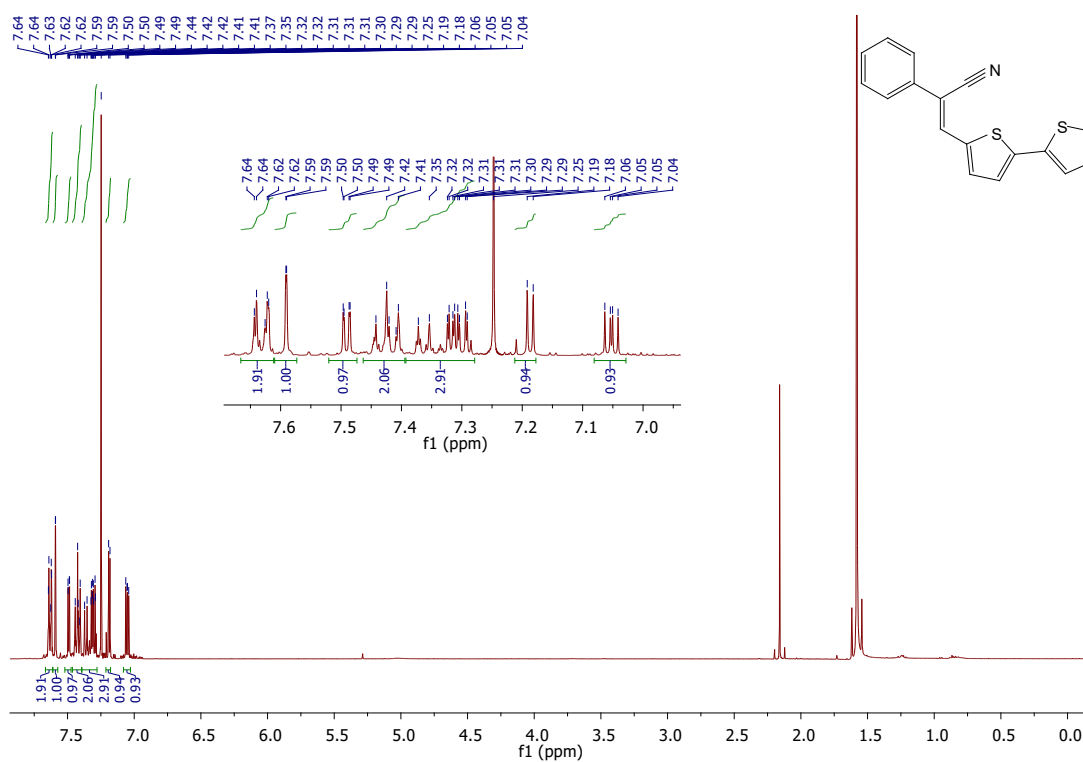

**e S17:**  $^1\text{H}$  NMR of Compound 6

**Figur**

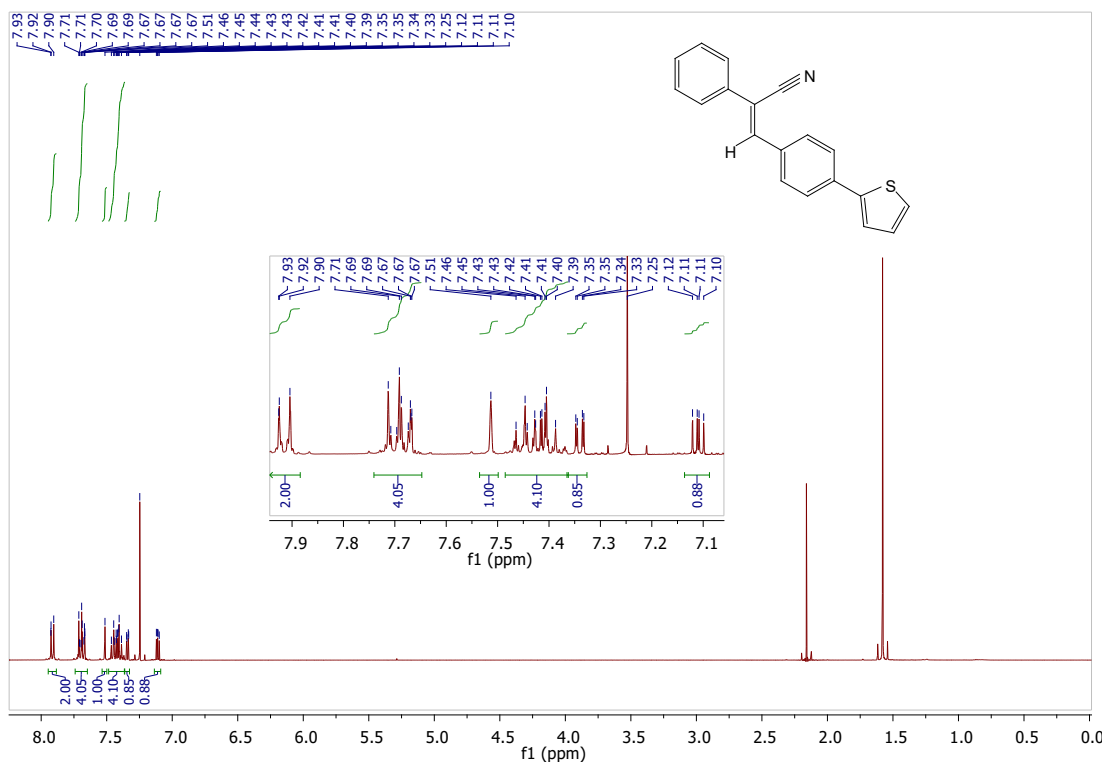

Figure S18: <sup>1</sup>H NMR of Compound 7

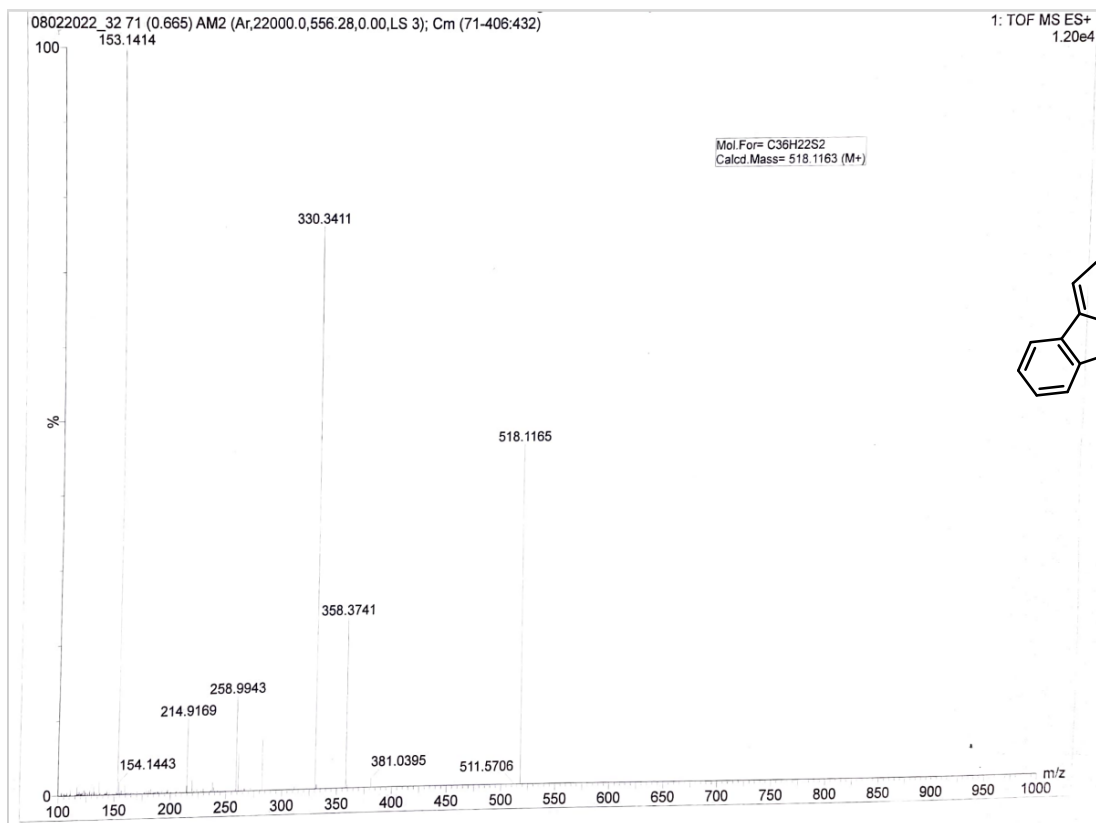

Figure S19: HRMS of Compound V1

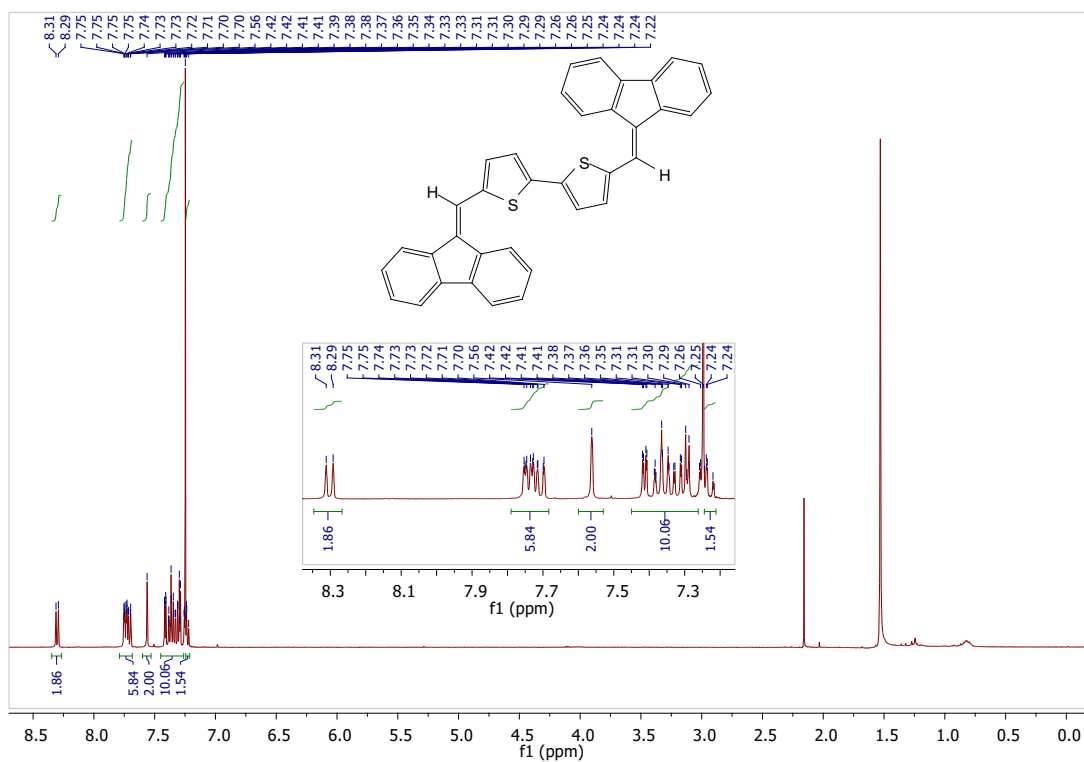

Figure S20: <sup>1</sup>H NMR of Compound V1

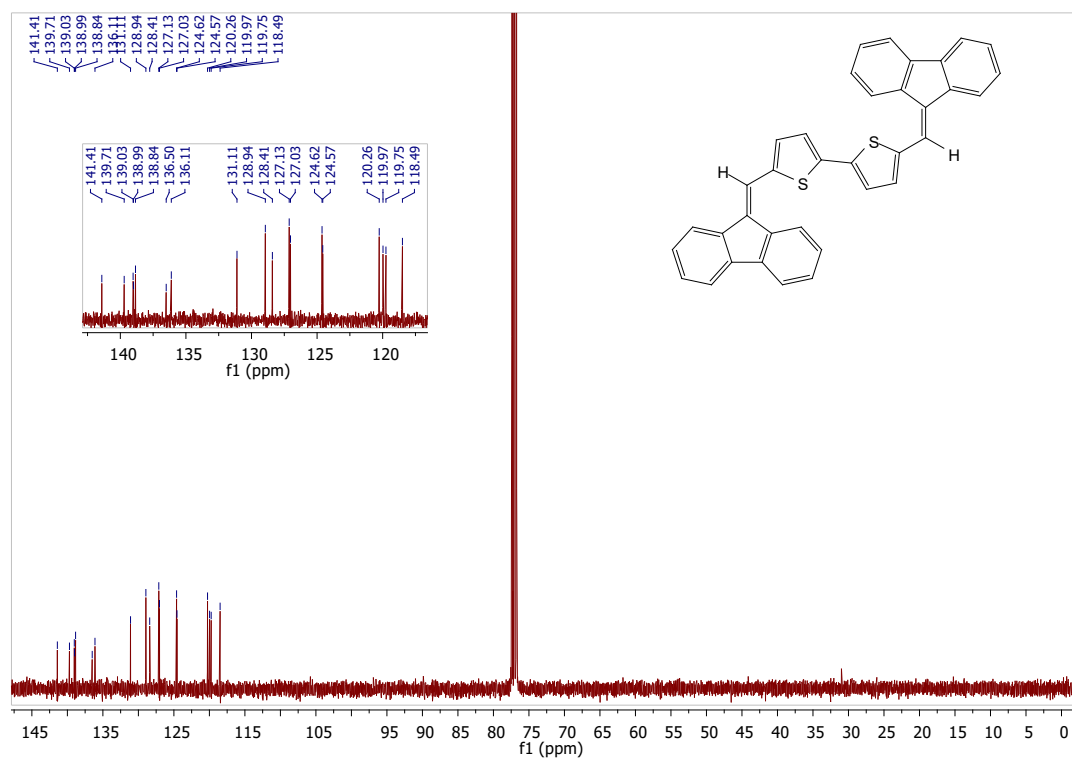

Figure S21: <sup>13</sup>C NMR of Compound V1

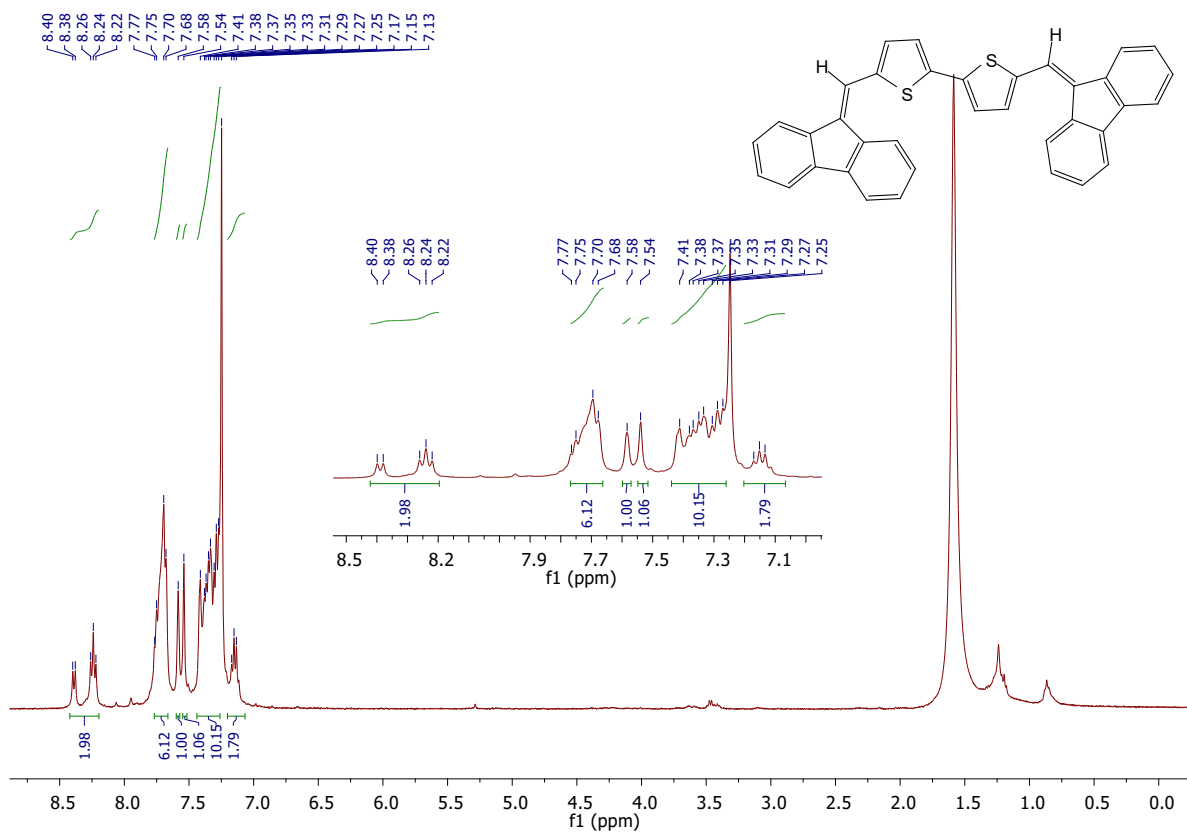

Figure S22: <sup>1</sup>H NMR of Compound V1-iso

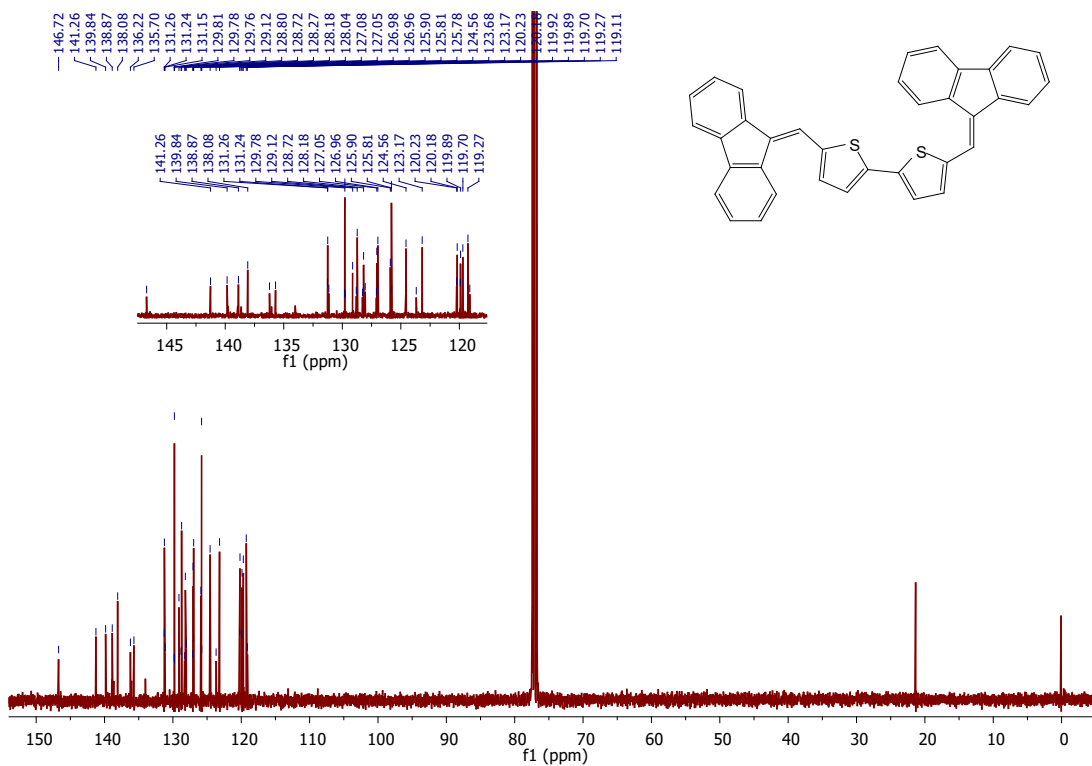

Figure S23: <sup>13</sup>C NMR of Compound V1-iso

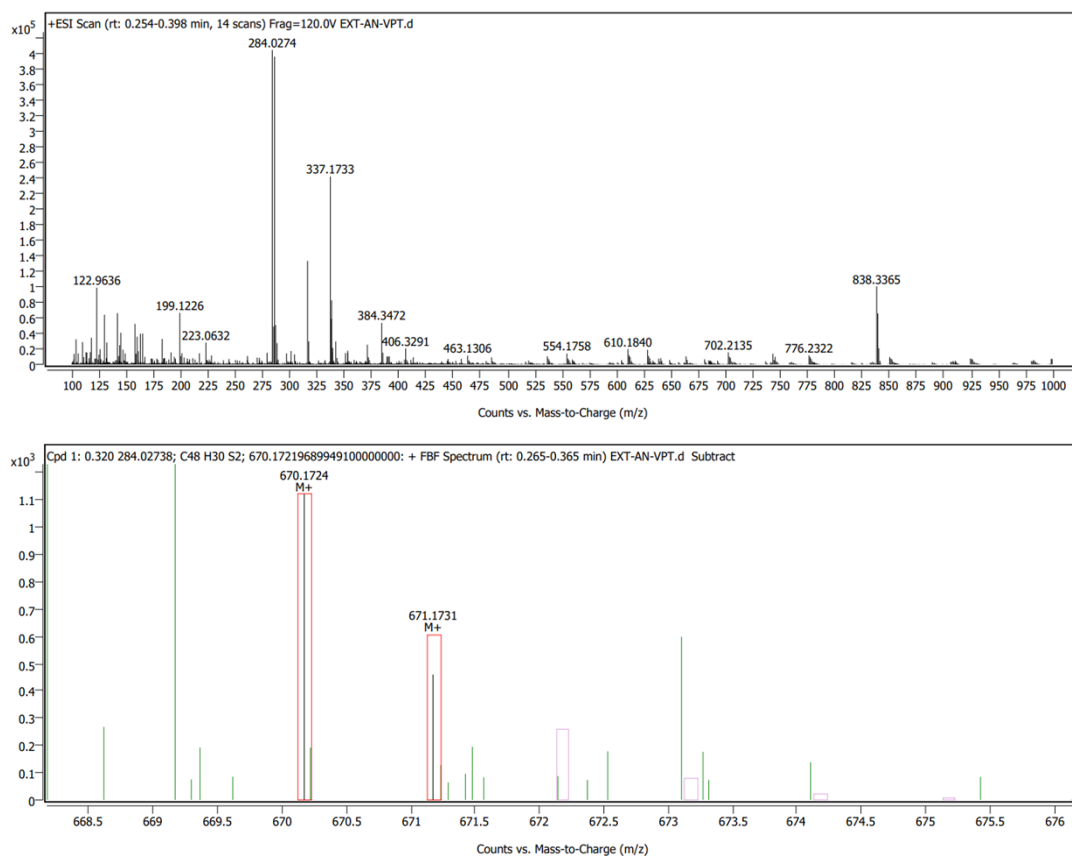

**Figure S24: HRMS of Compound V2**

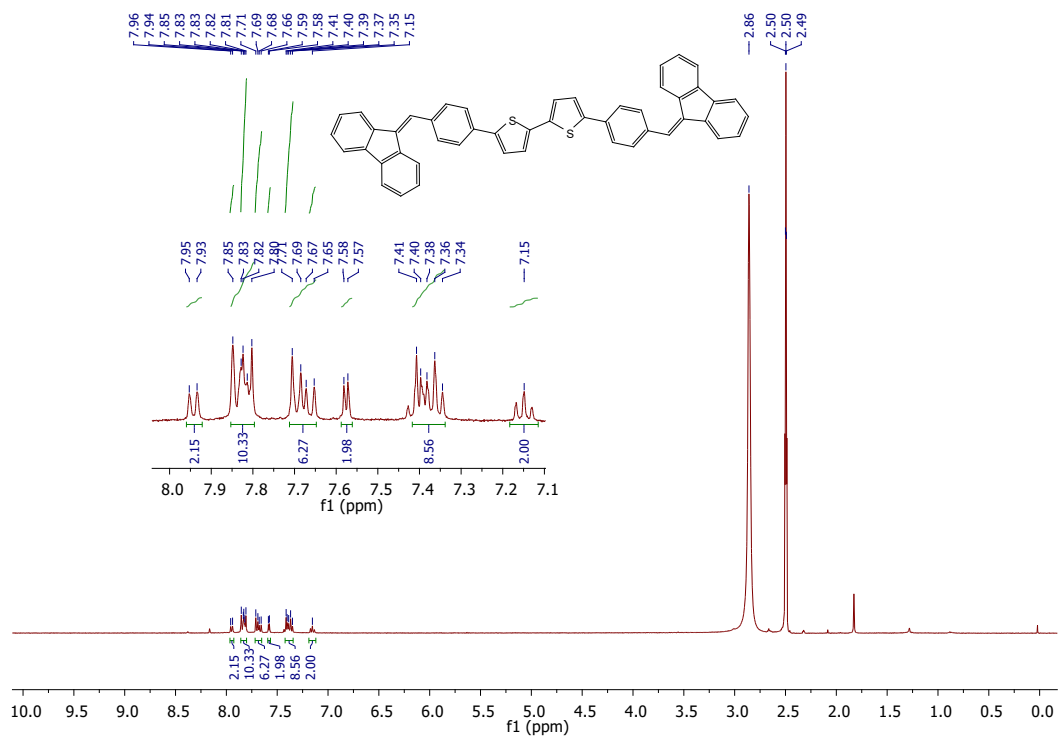

**Figure S25: <sup>1</sup>H NMR of Compound V2**



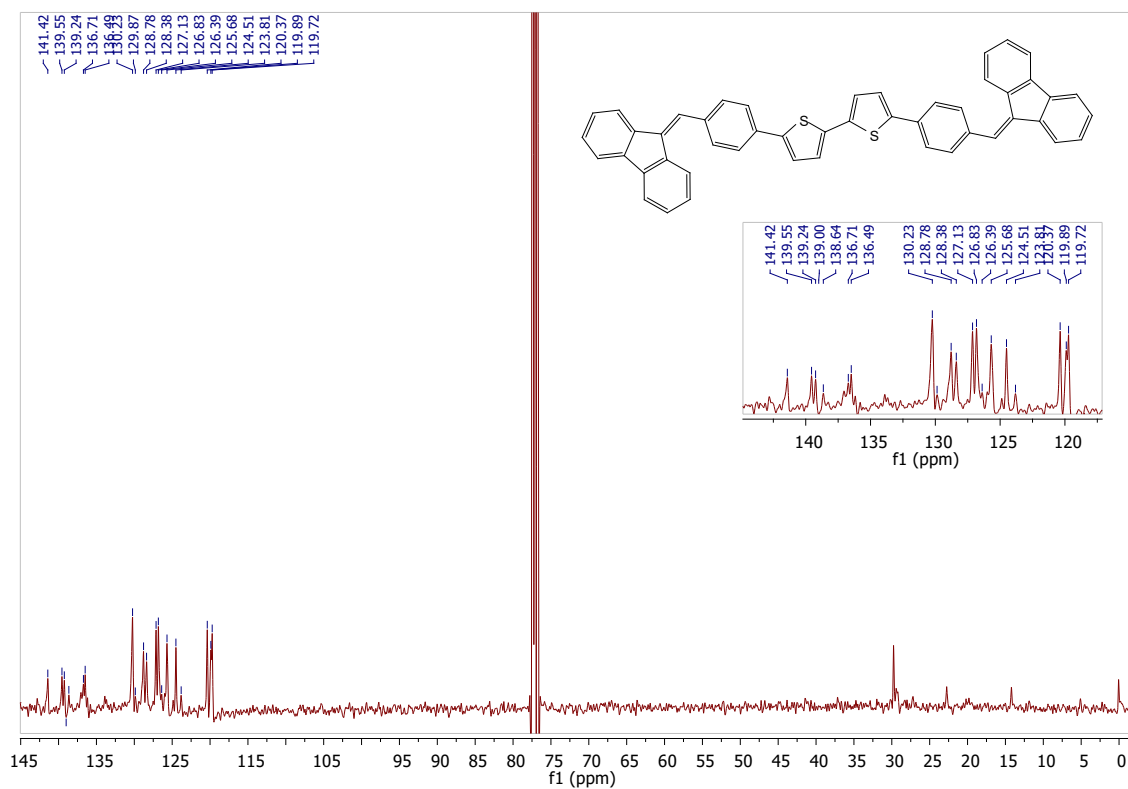

Figure S26: <sup>13</sup>C NMR of Compound V2

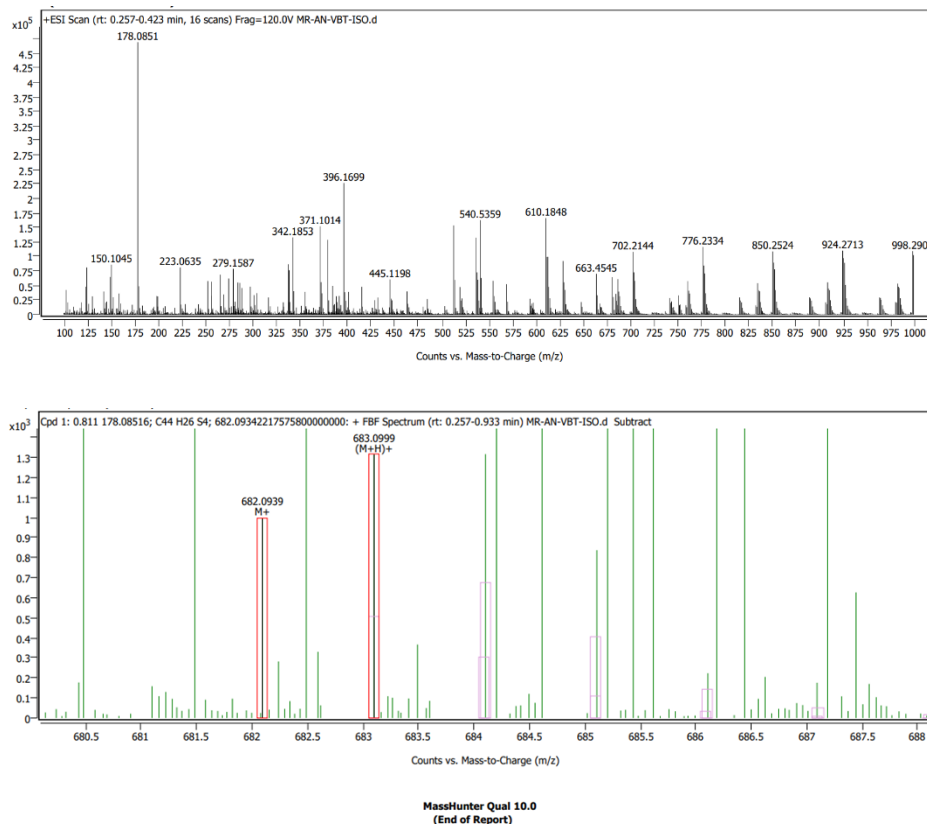

Figure S27: HRMS of Compound V3

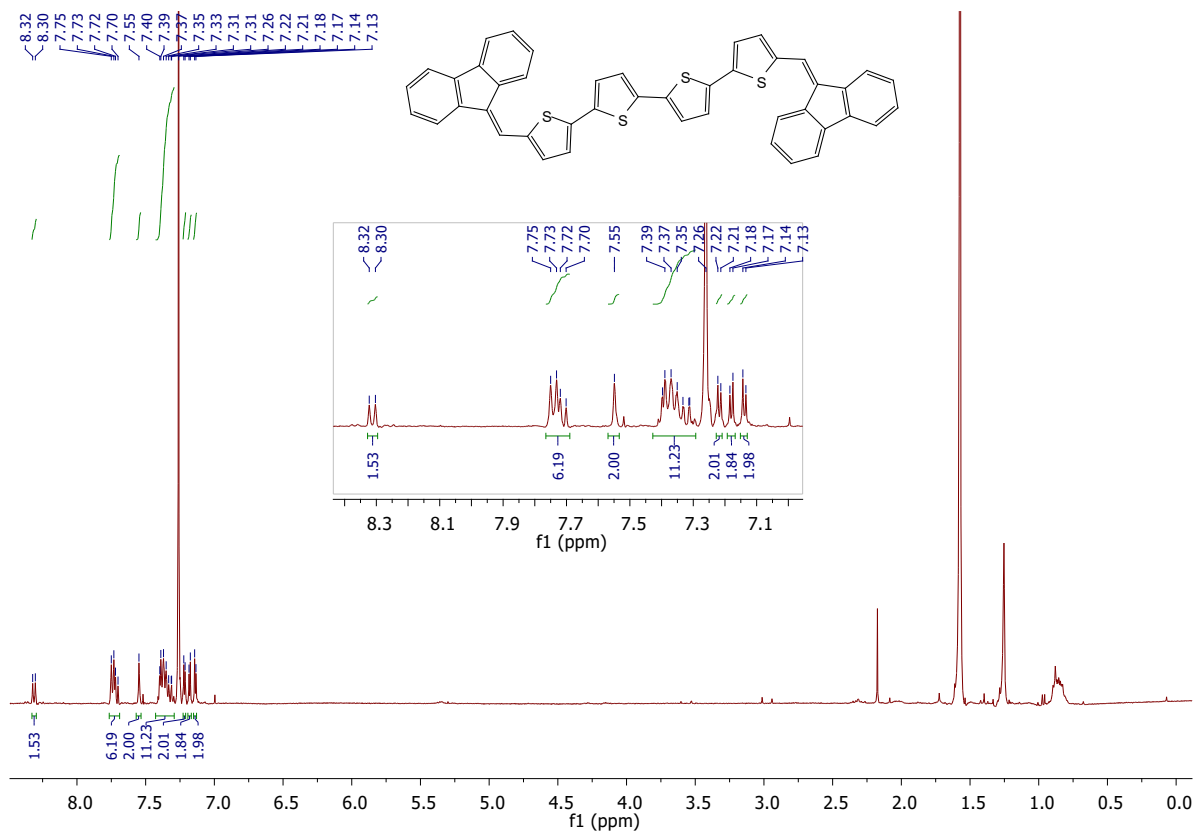

**Figure S28:** <sup>1</sup>H NMR of Compound V3

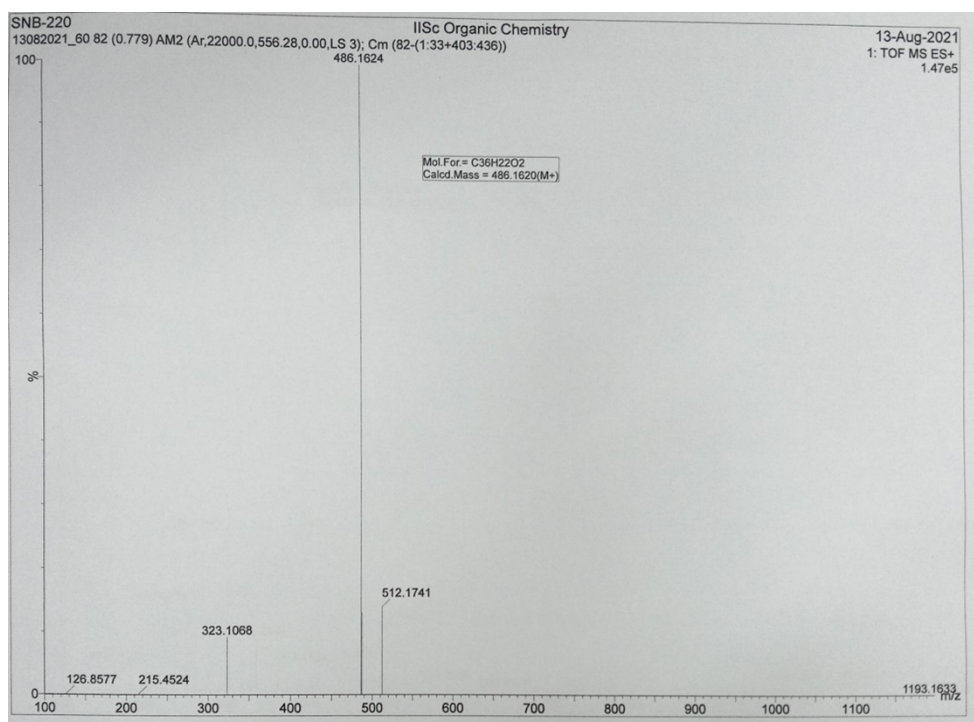

**Figure S29:** HRMS of Compound V4

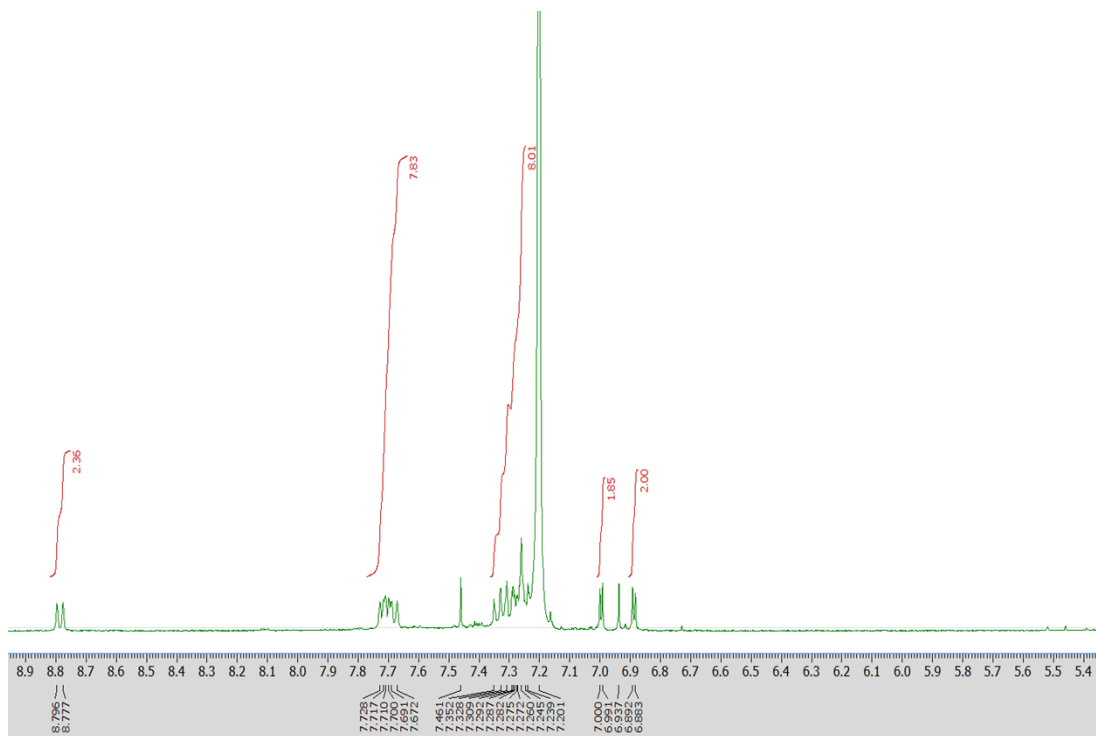

Figure S30:  $^1\text{H}$  NMR of Compound V4

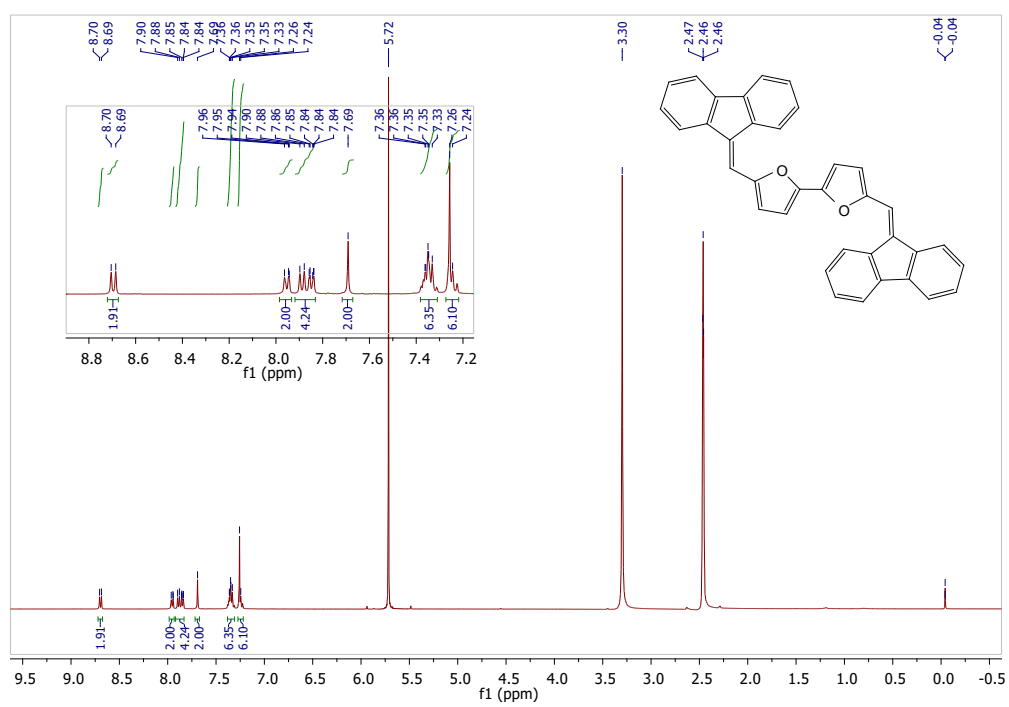

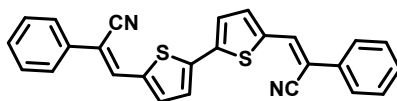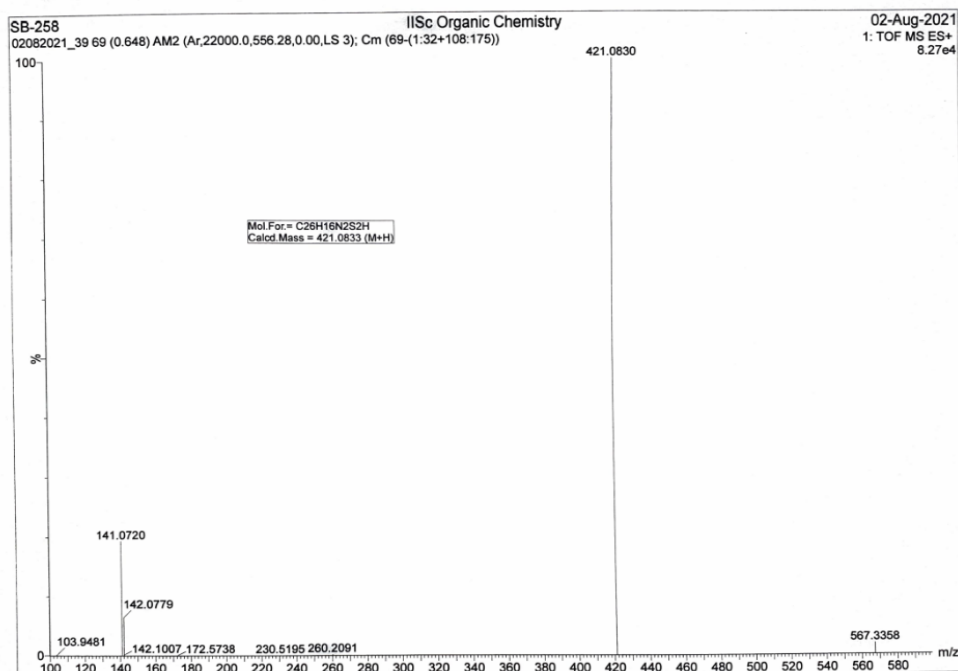

Figure S32: HRMS of Compound C1

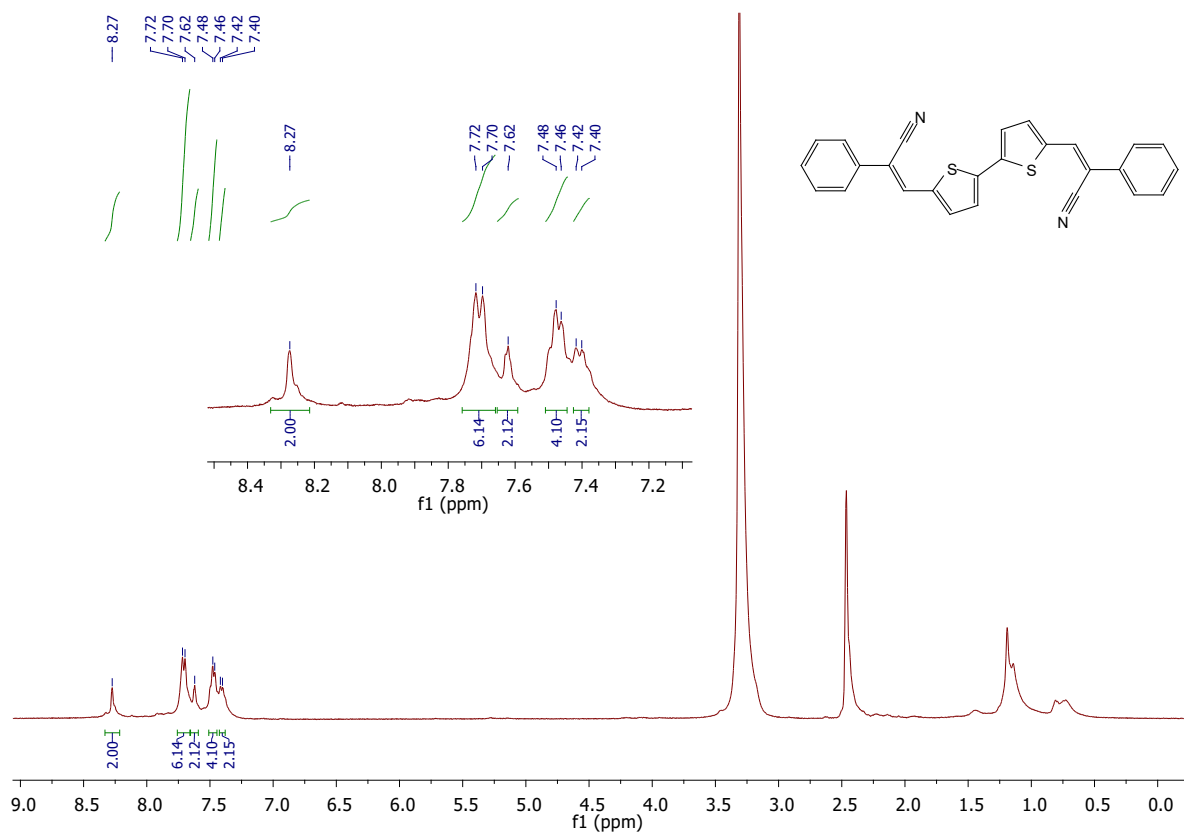

Figure S33: <sup>1</sup>H NMR of Compound C1

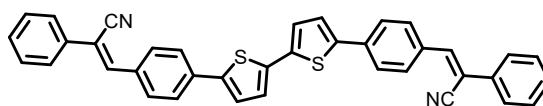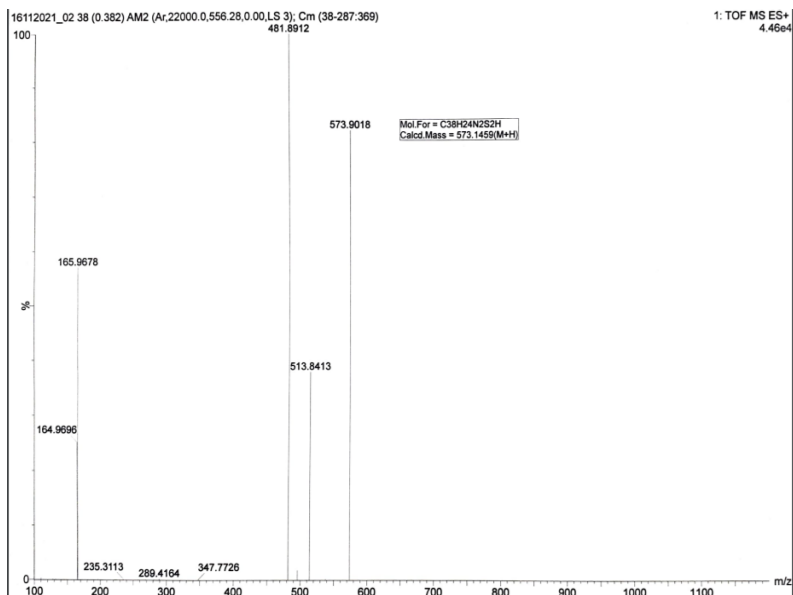

Figure S34: HRMS of Compound C2

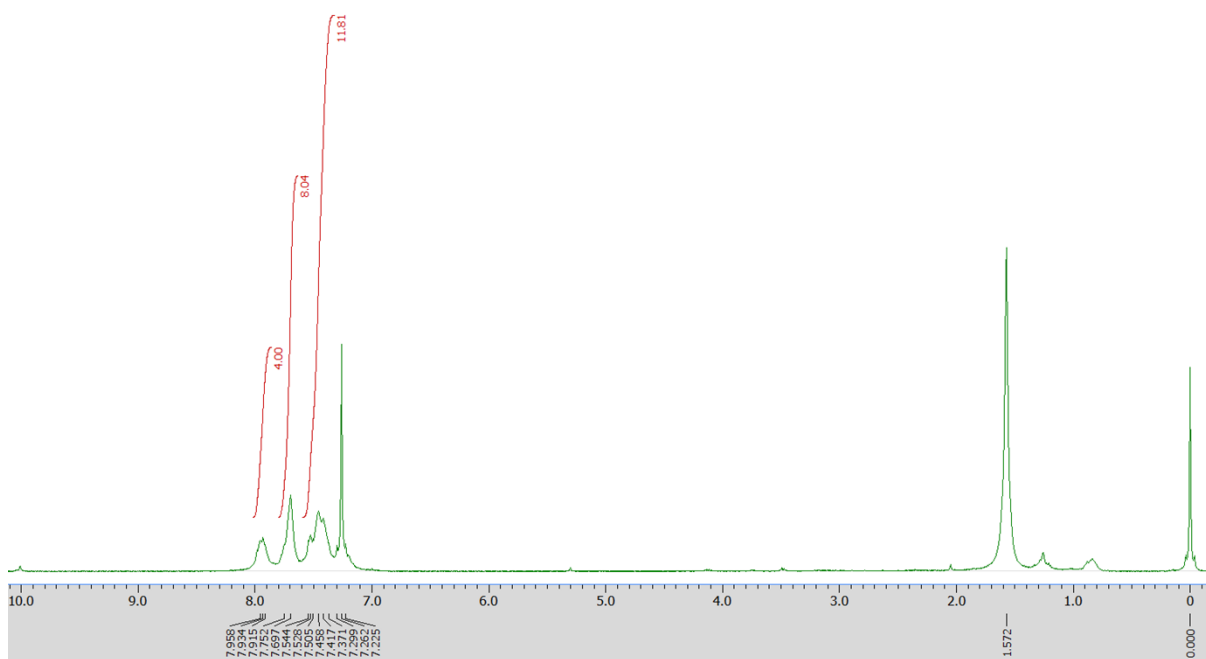

Figure S35: <sup>1</sup>H NMR of Compound C3 recorded in CDCl<sub>3</sub>.
